# Supplementary material for: A proximity-dependent biotinylation map of a human cell: an interactive web resource
Source: bioRxiv or medRxiv preprint supplement (doi:10.1101/796391), 2021-03-17

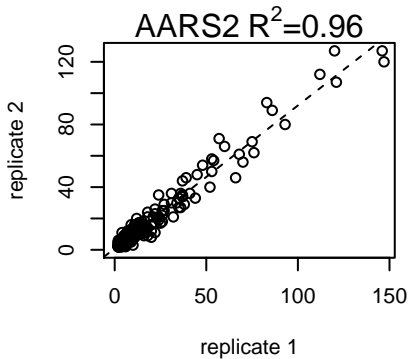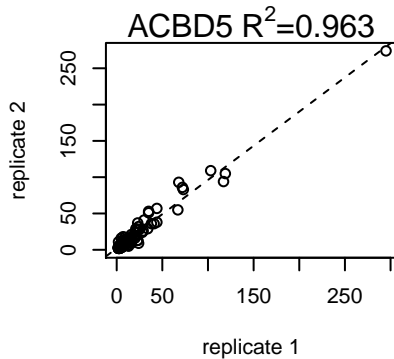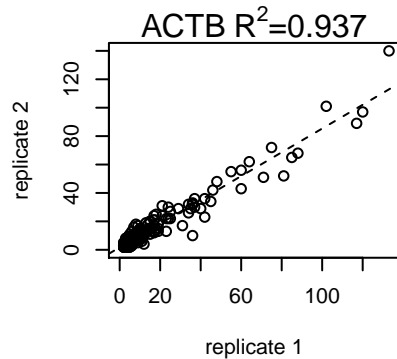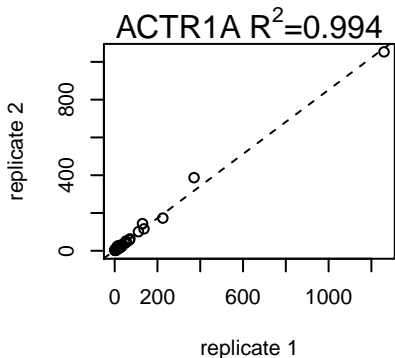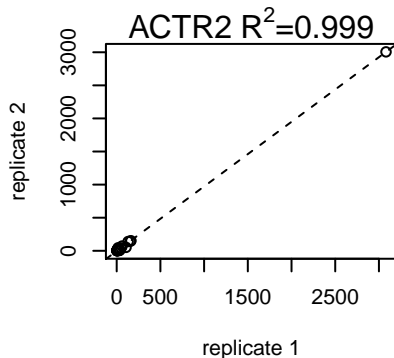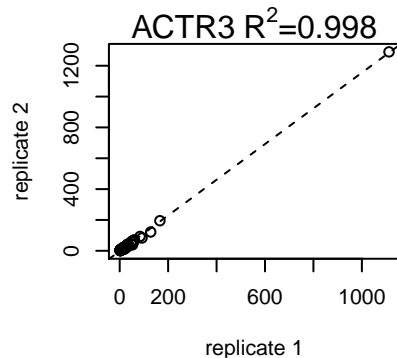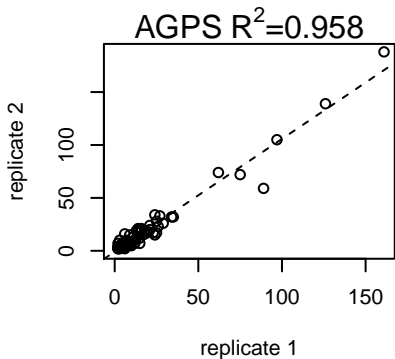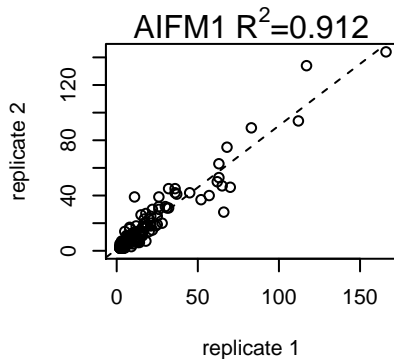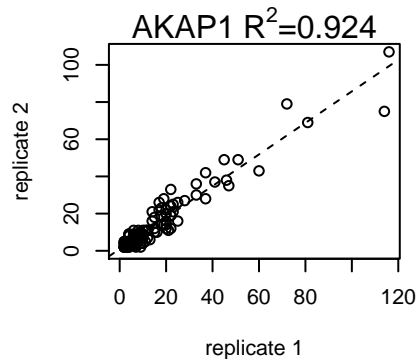

AKAP1\_target  $R^2=0.966$

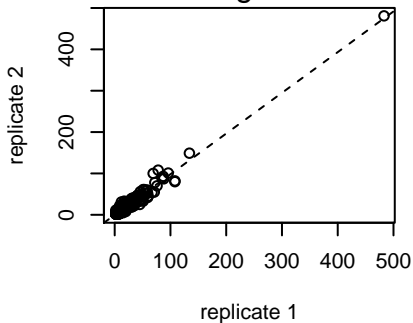

AMOT  $R^2=0.95$

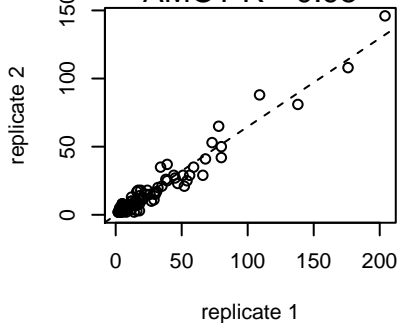

ANAPC2  $R^2=0.951$

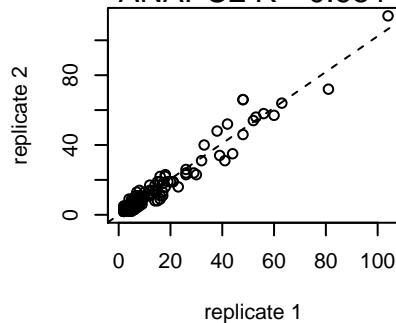

ANK3  $R^2=0.967$

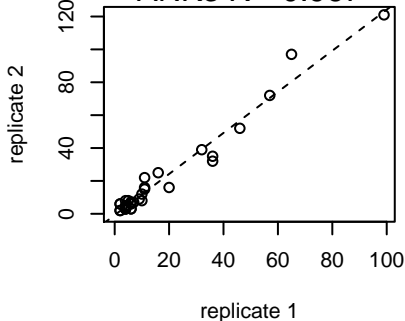

ANKFY1  $R^2=0.97$

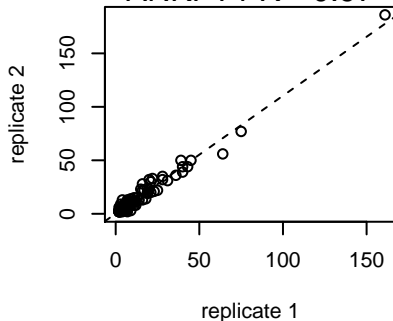

AP2B1  $R^2=0.942$

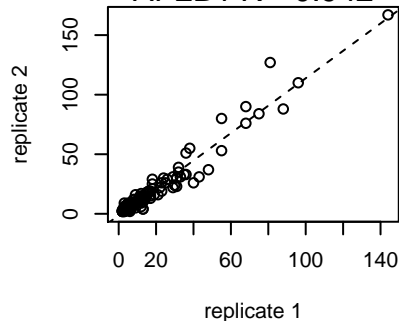

APEX1  $R^2=0.981$

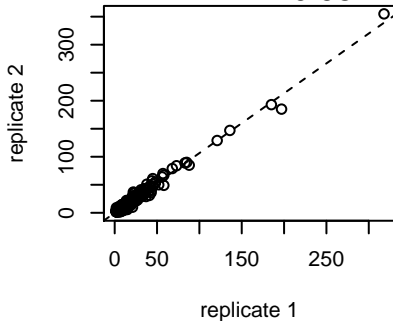

ARF6  $R^2=0.963$

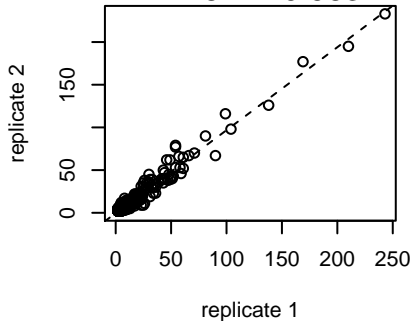

ASF1A  $R^2=0.98$

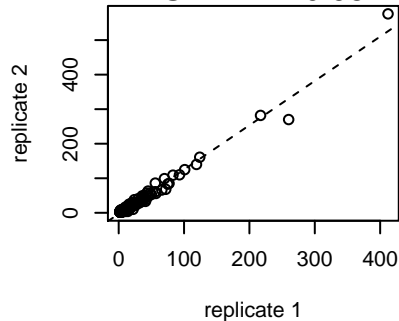

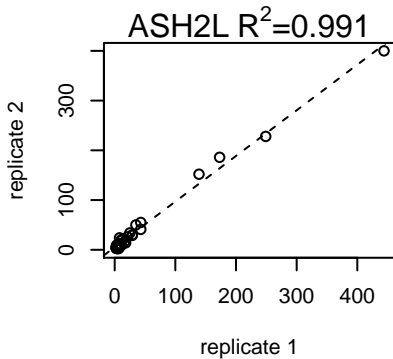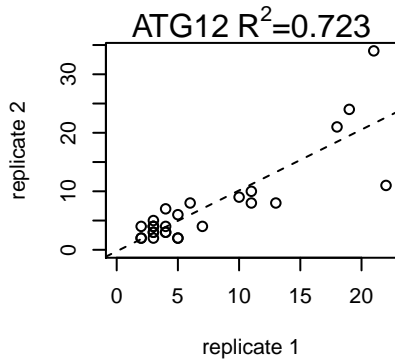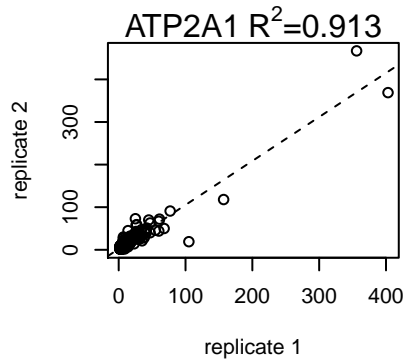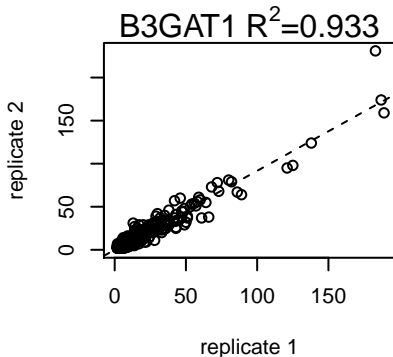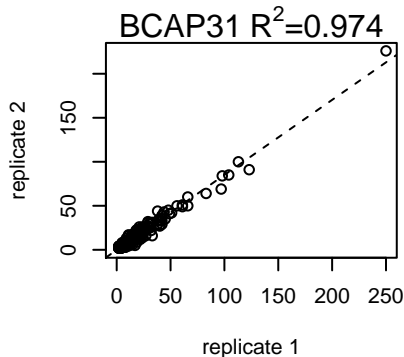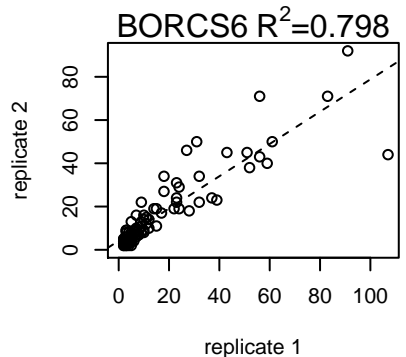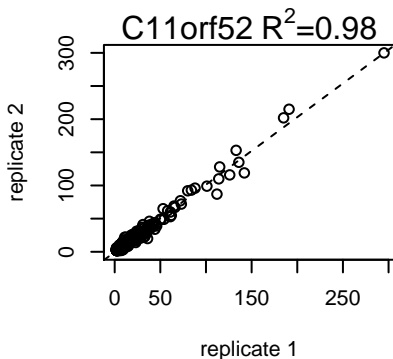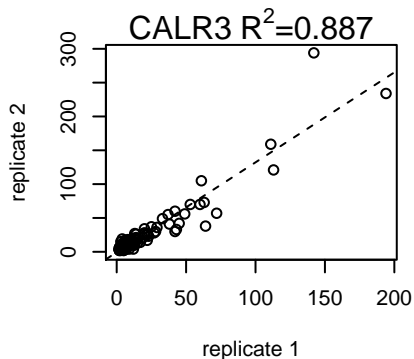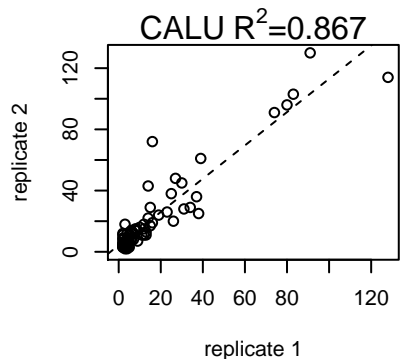

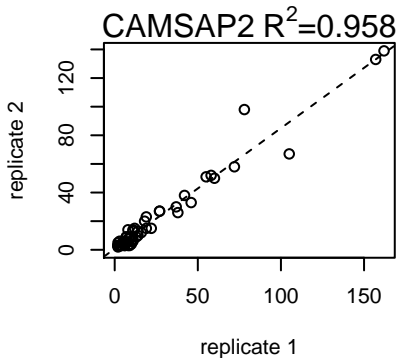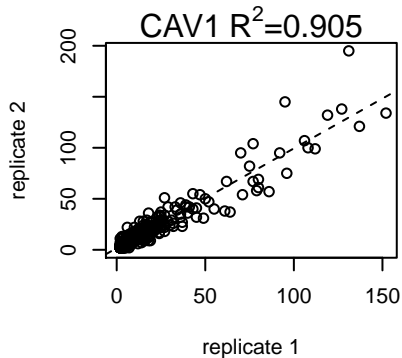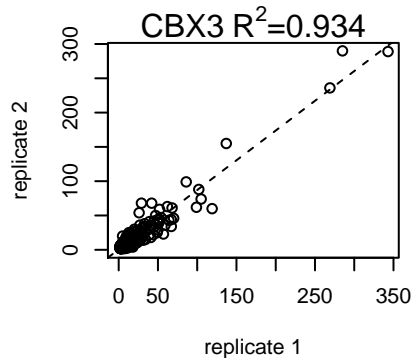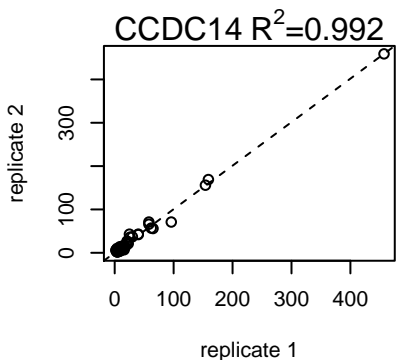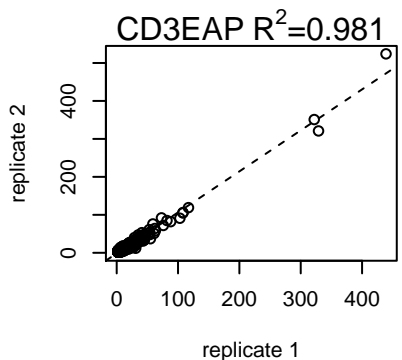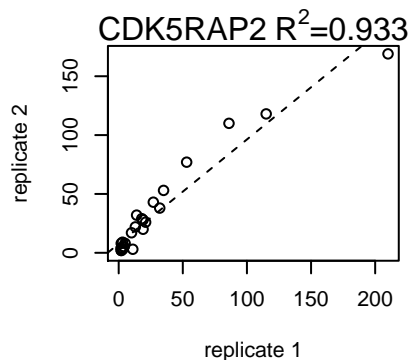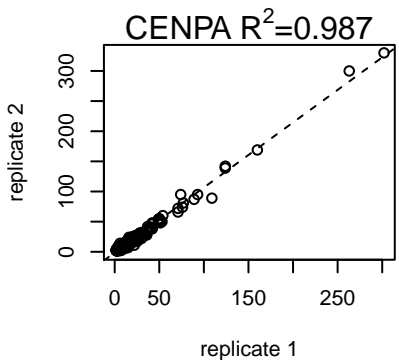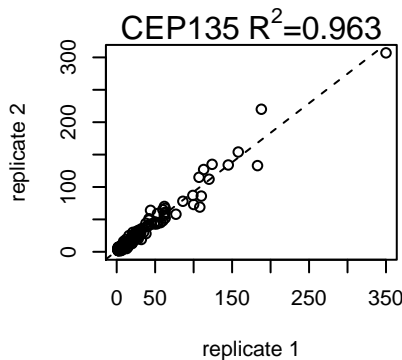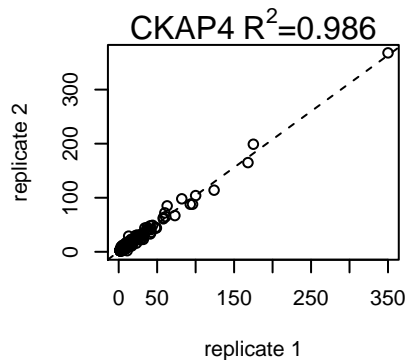



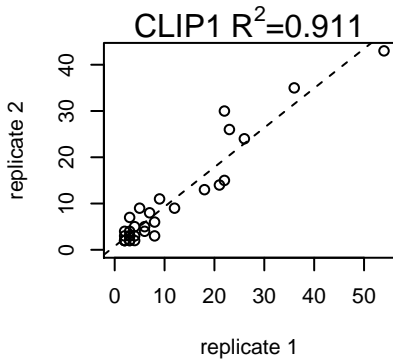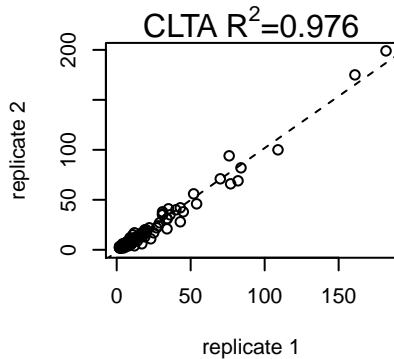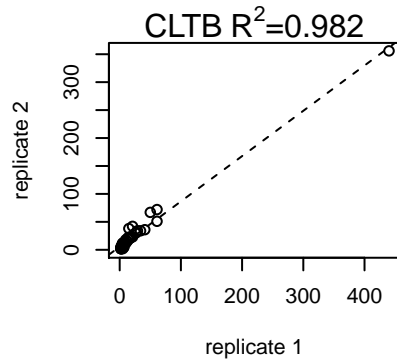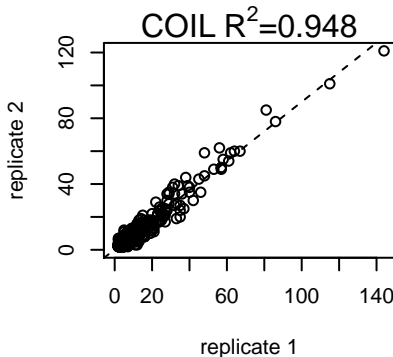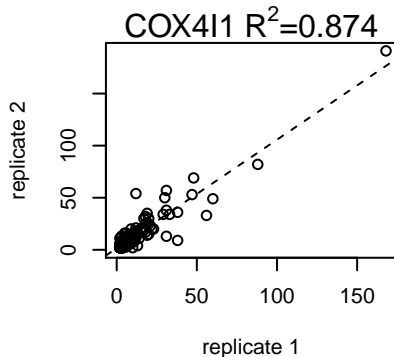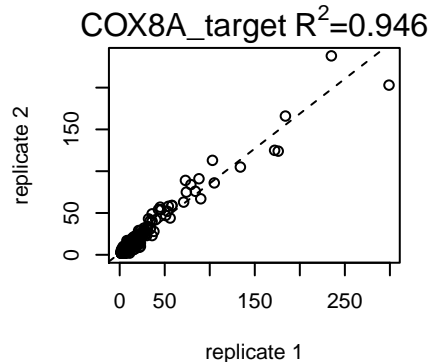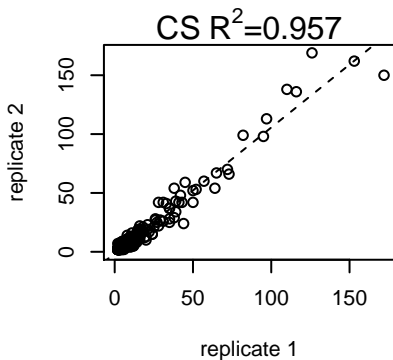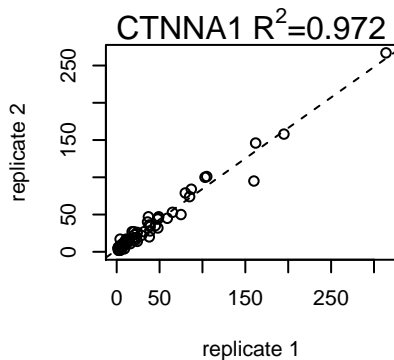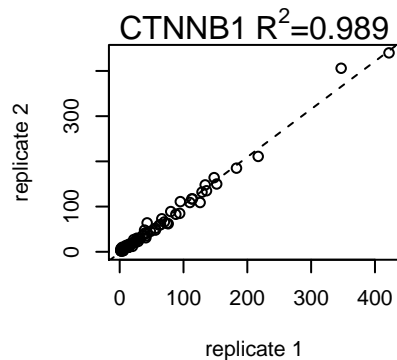

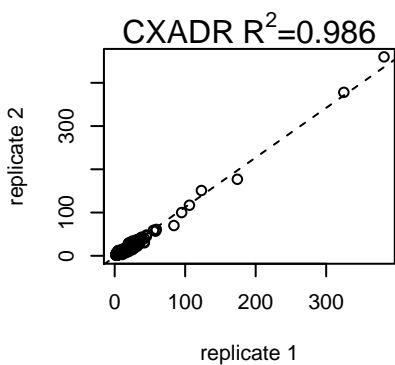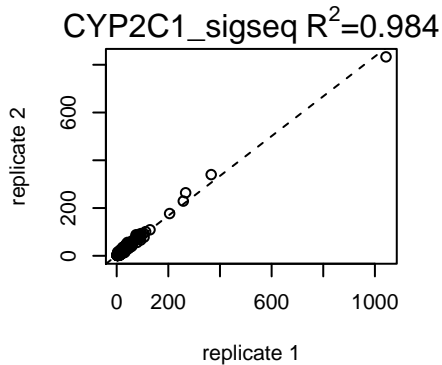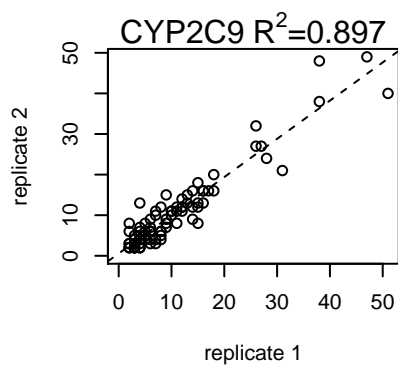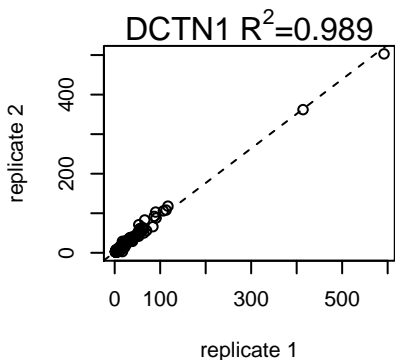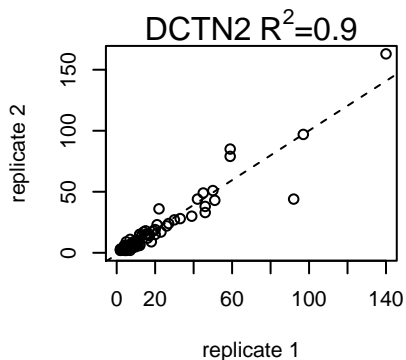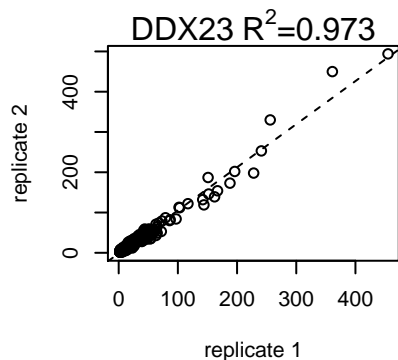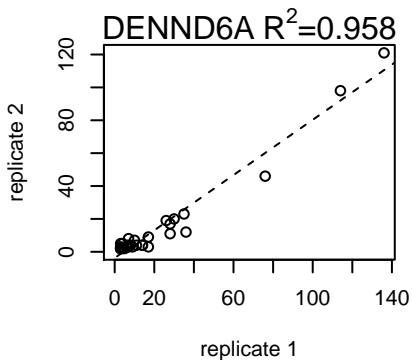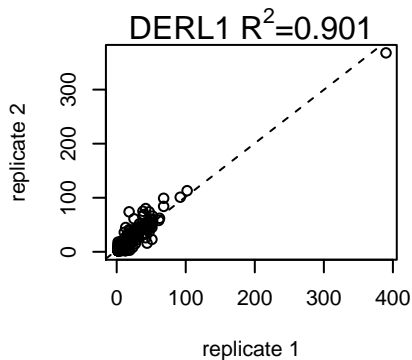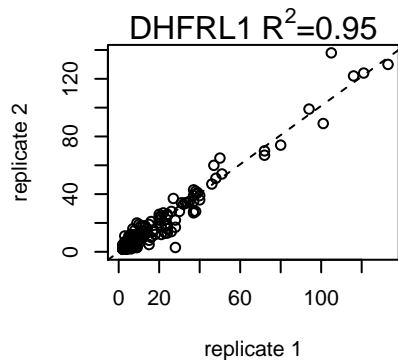

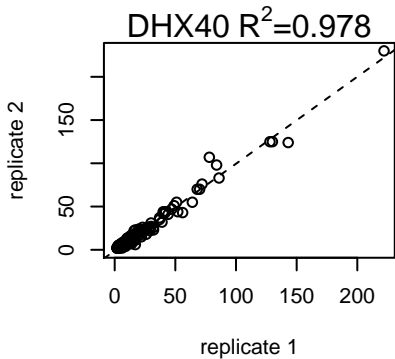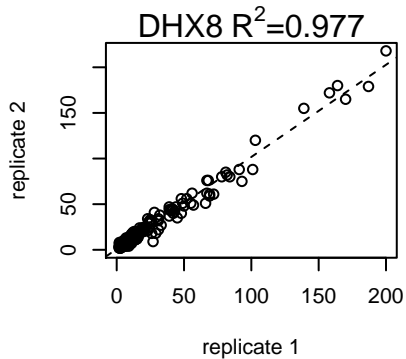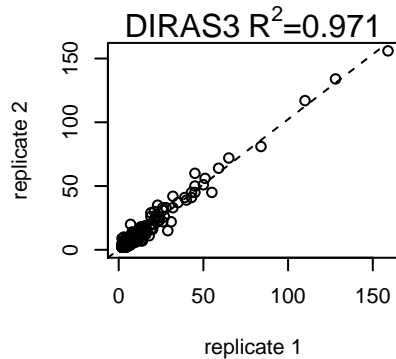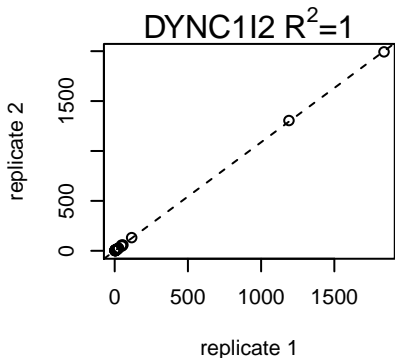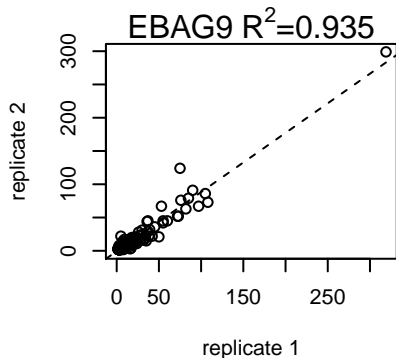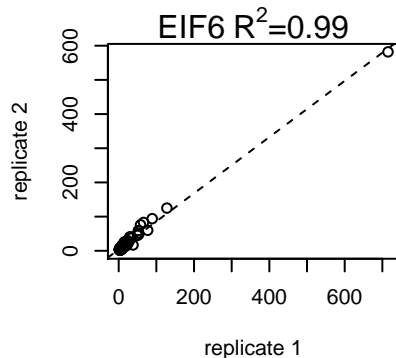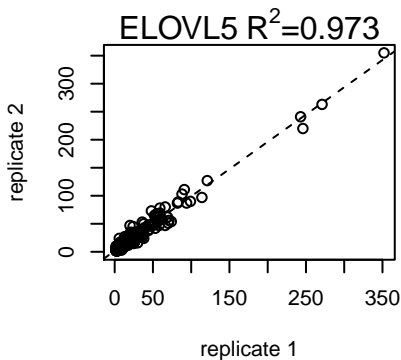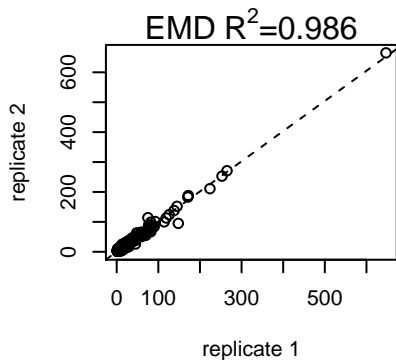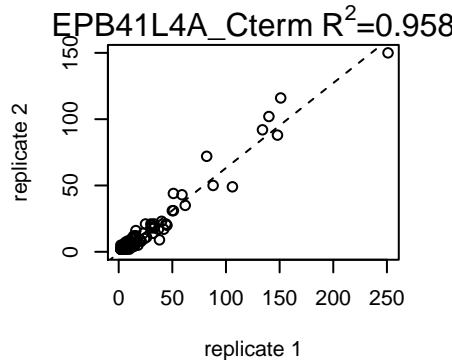

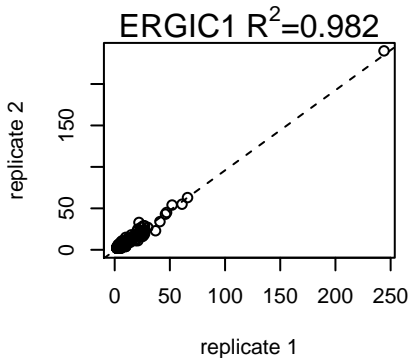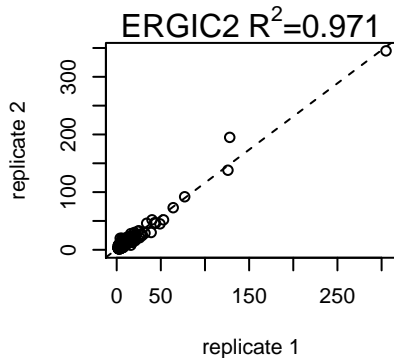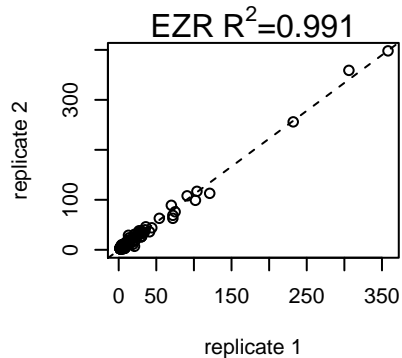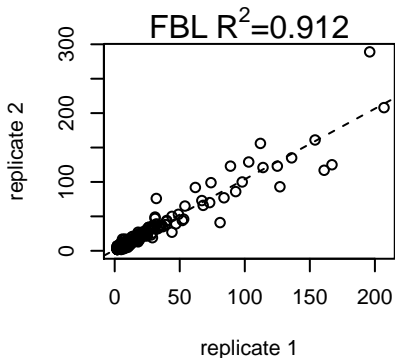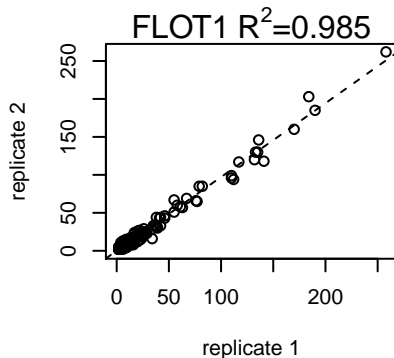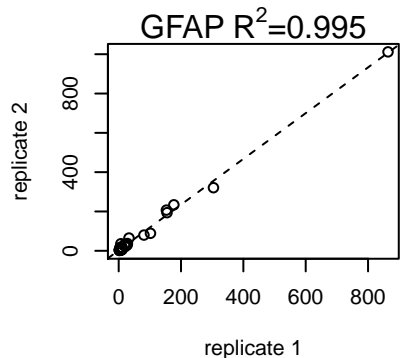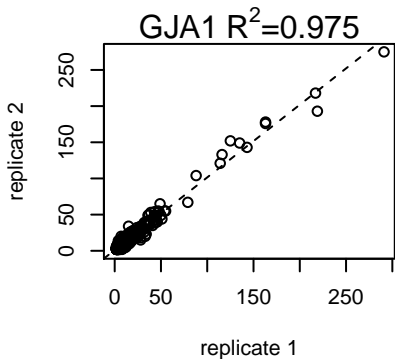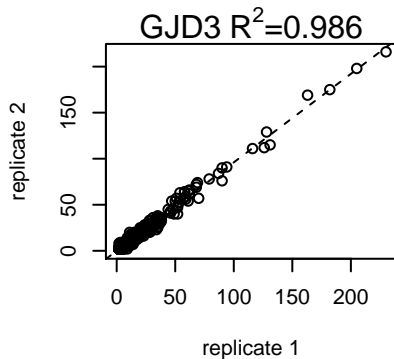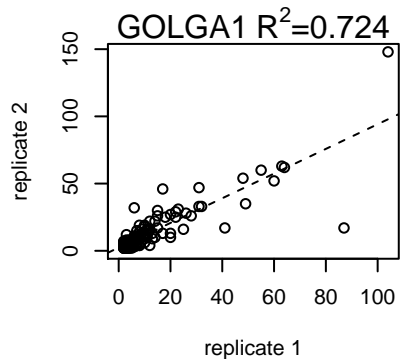

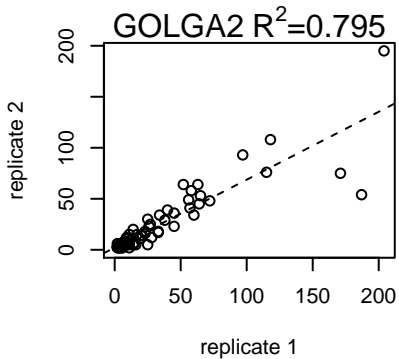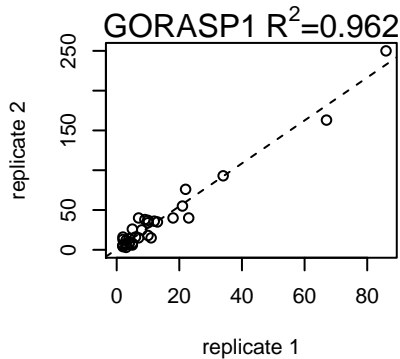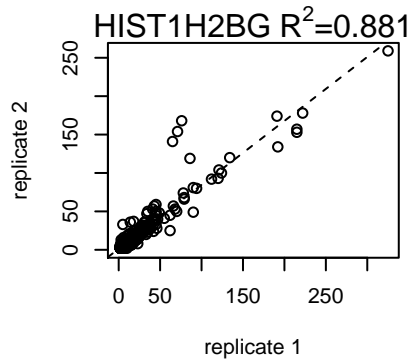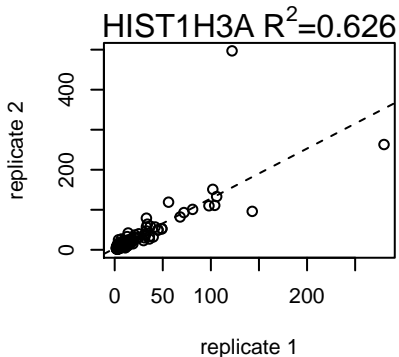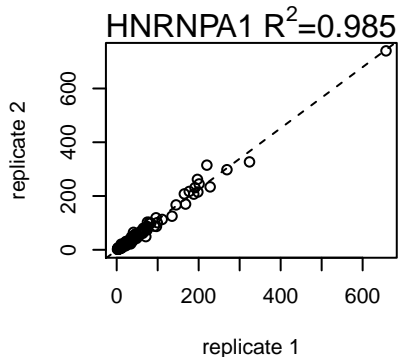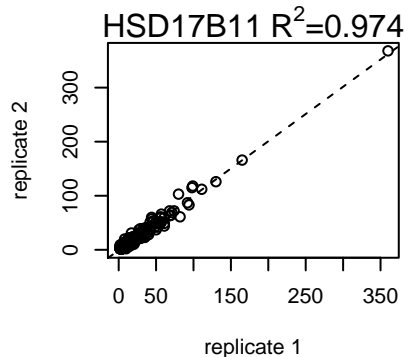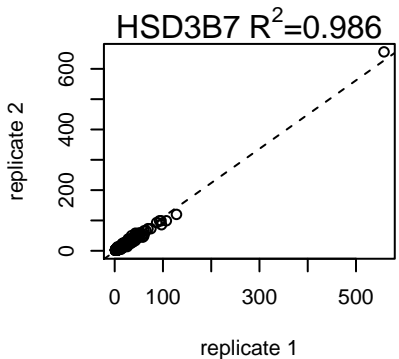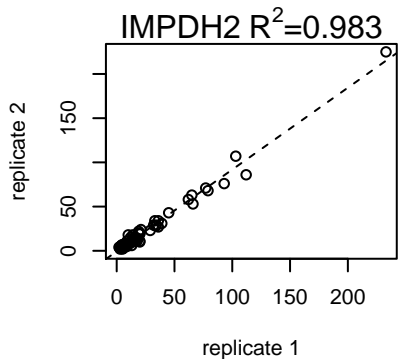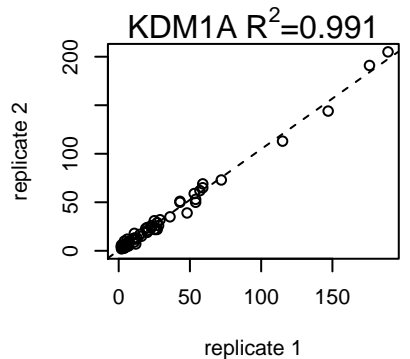

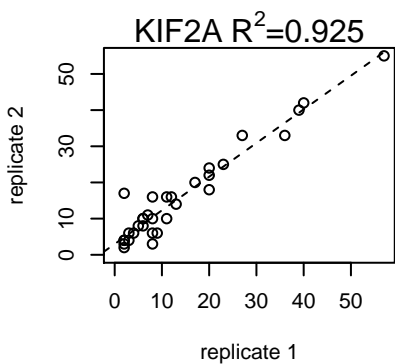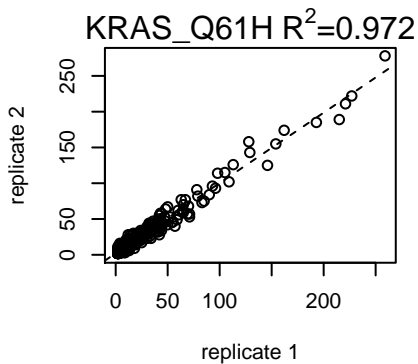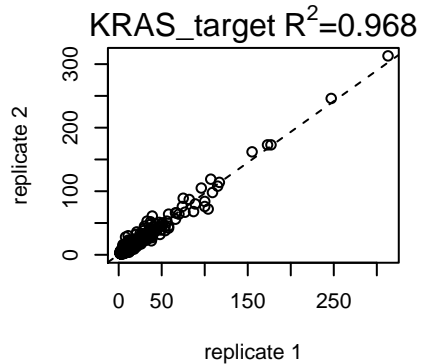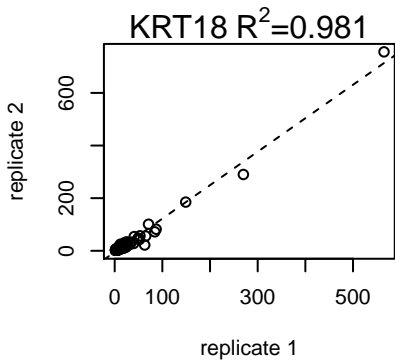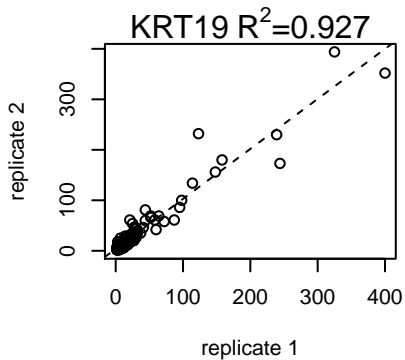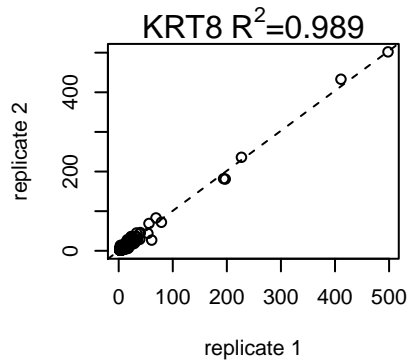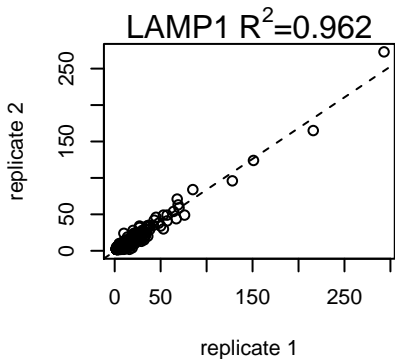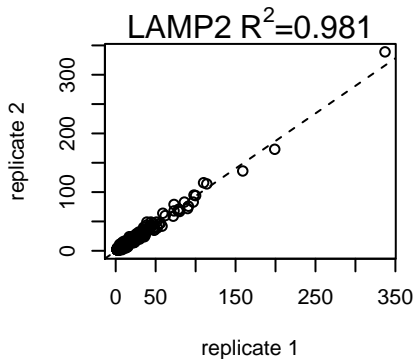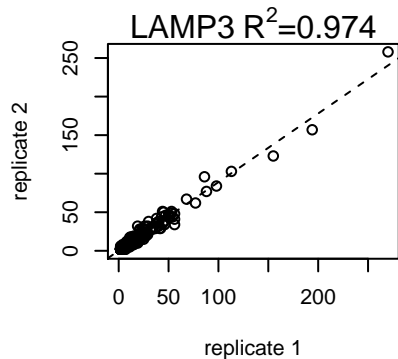

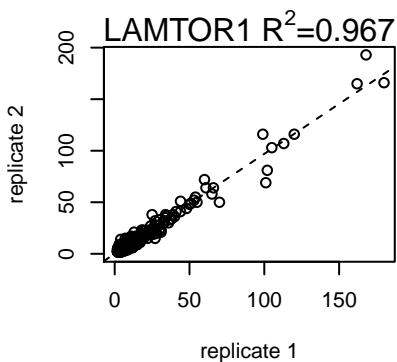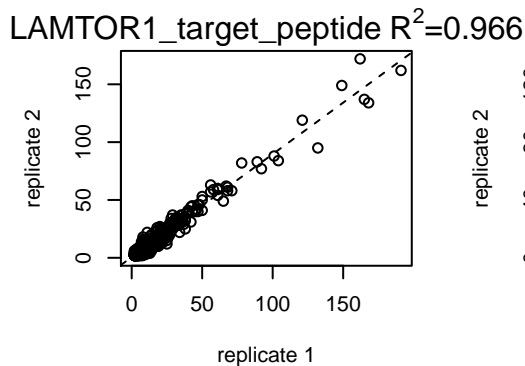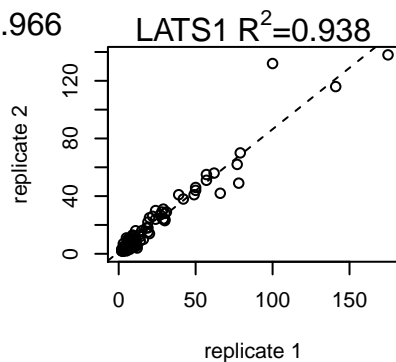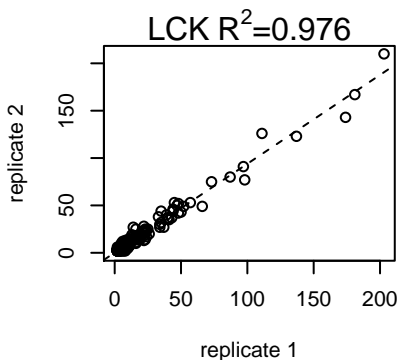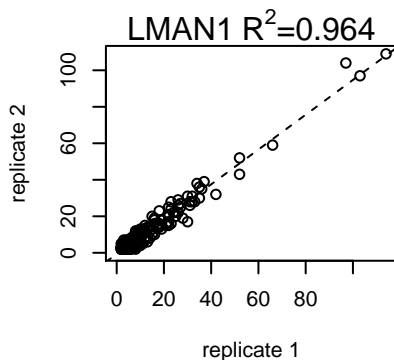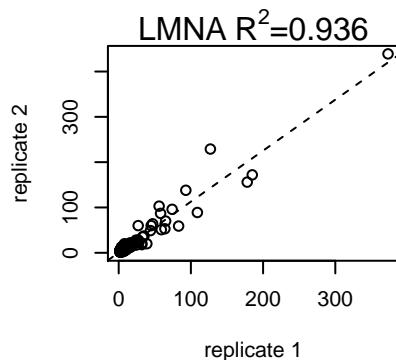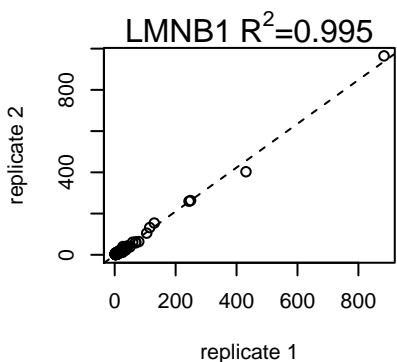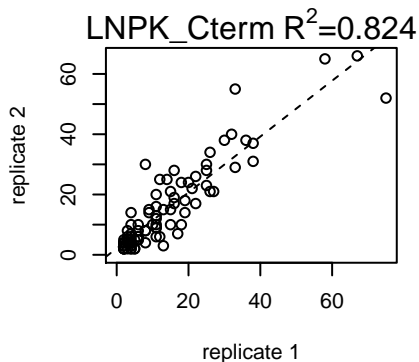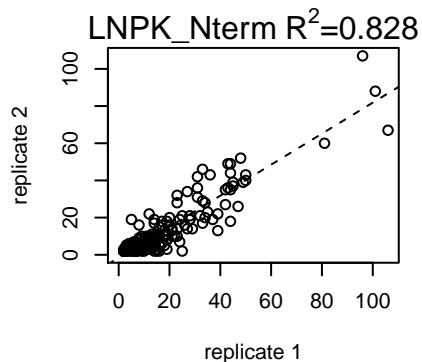

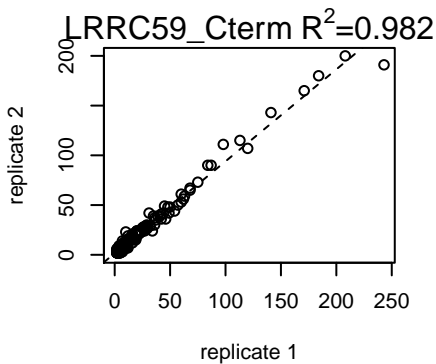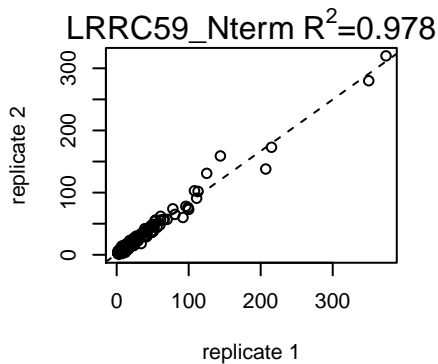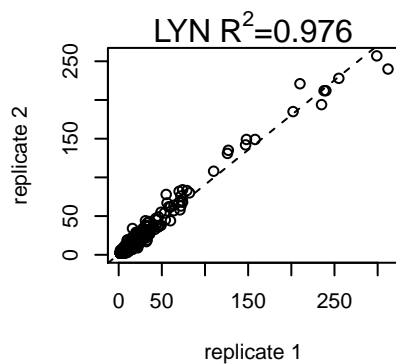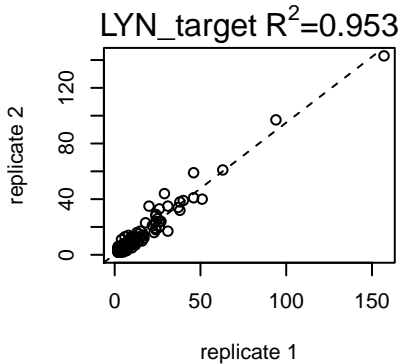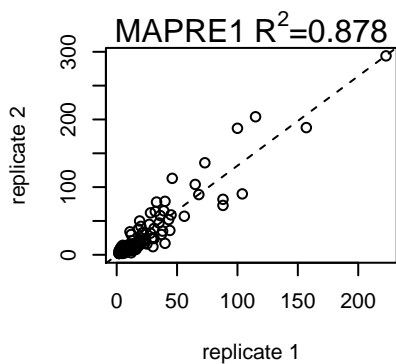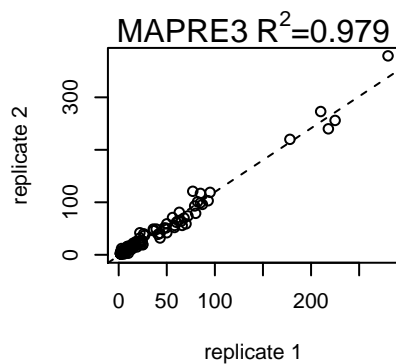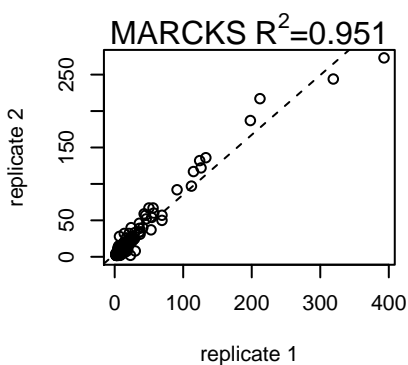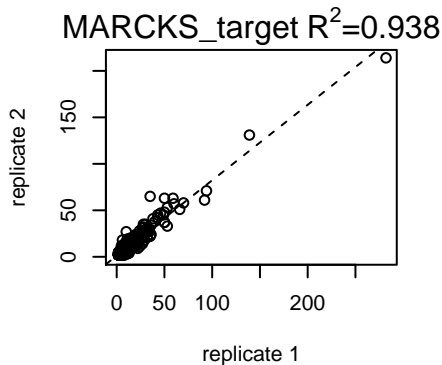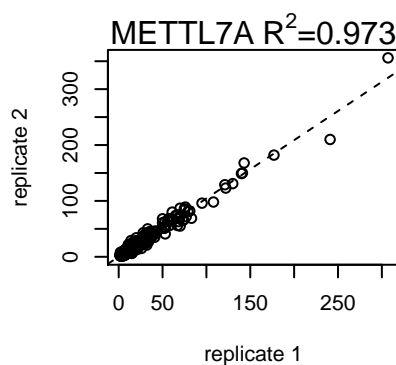



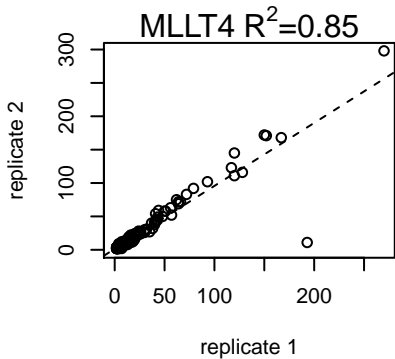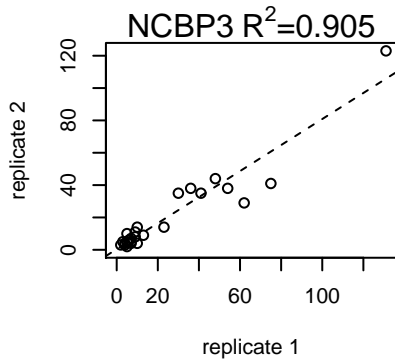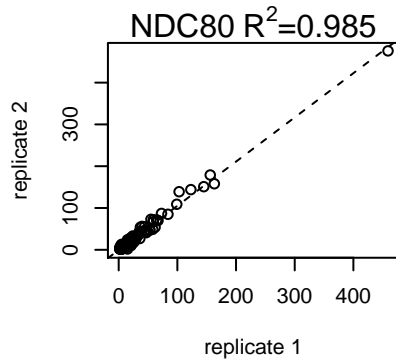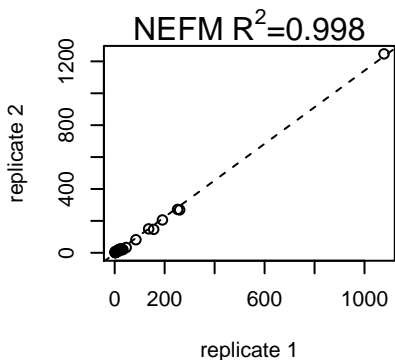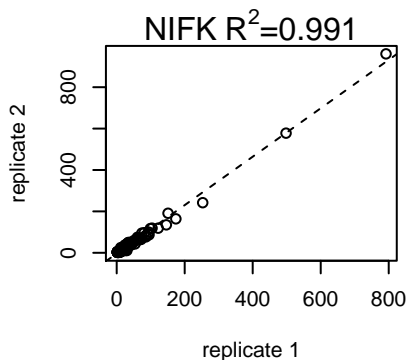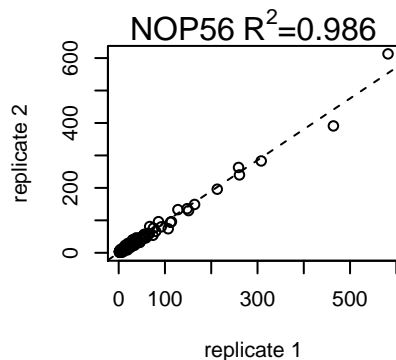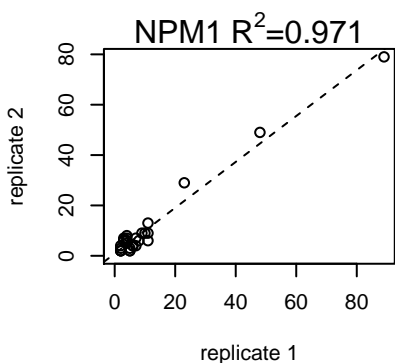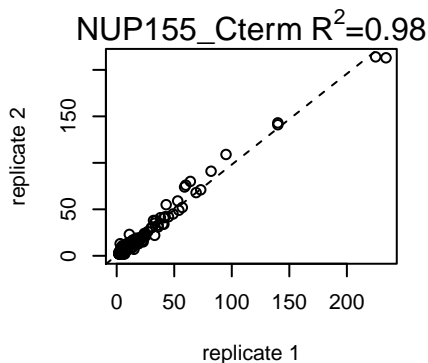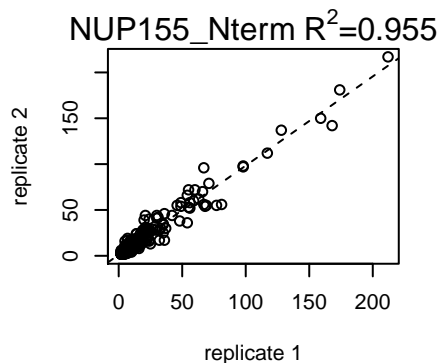

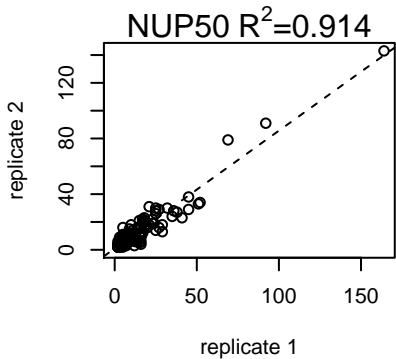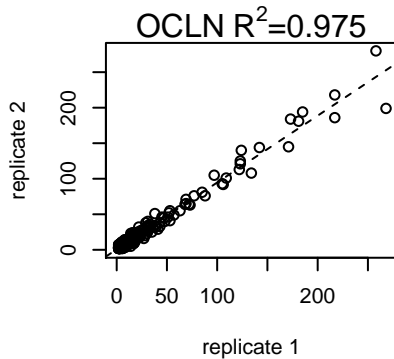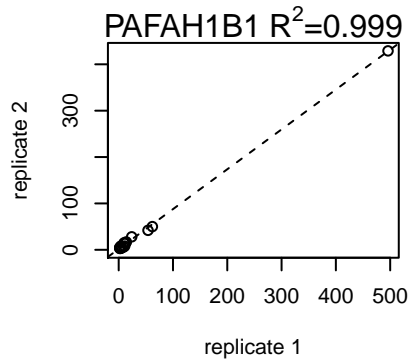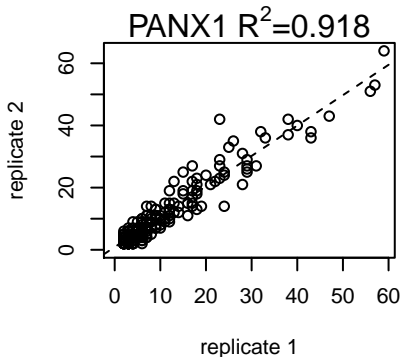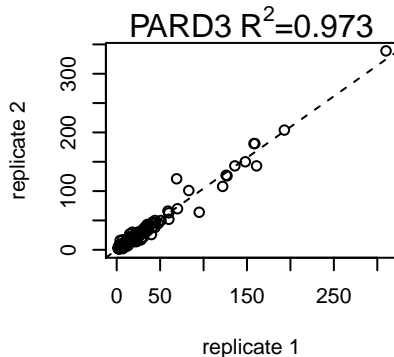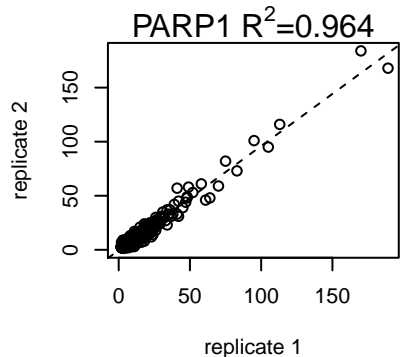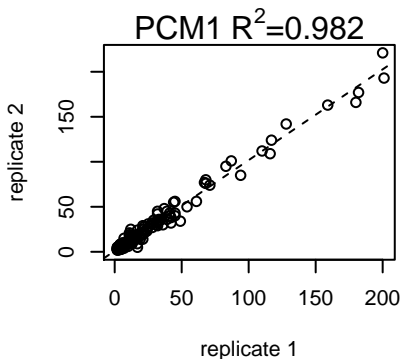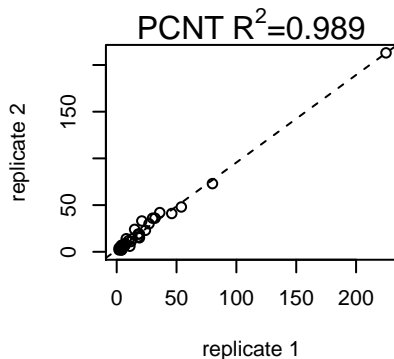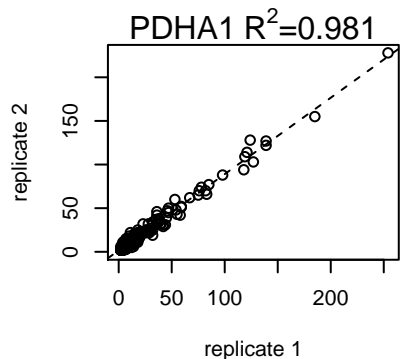

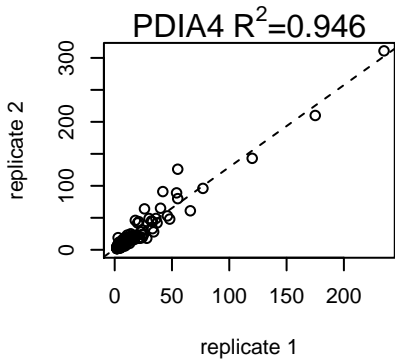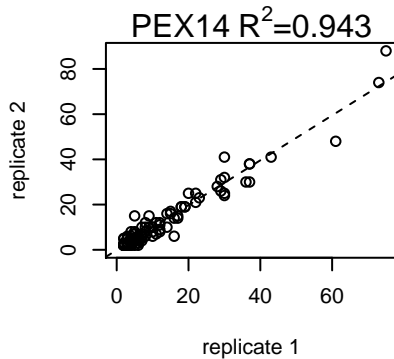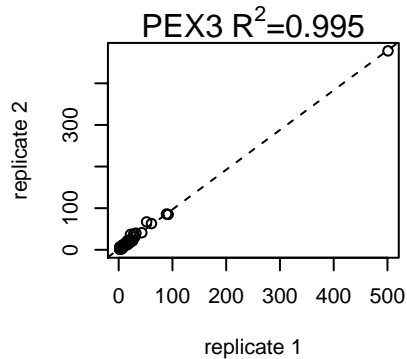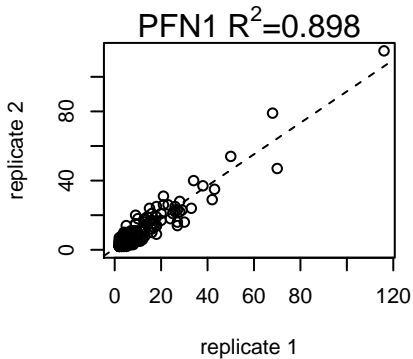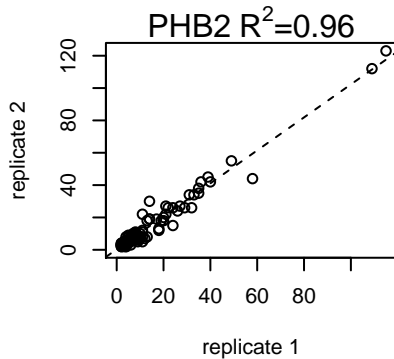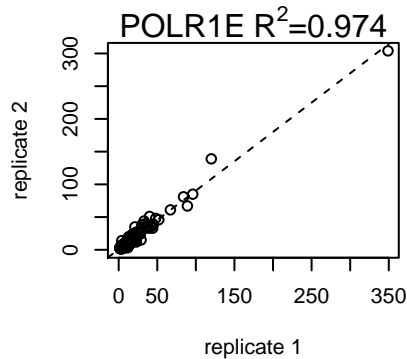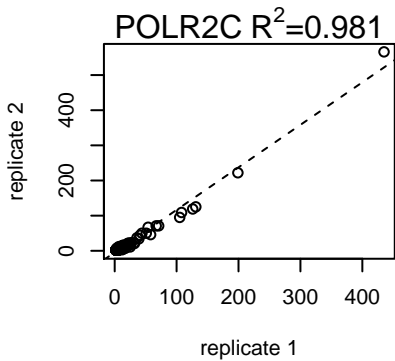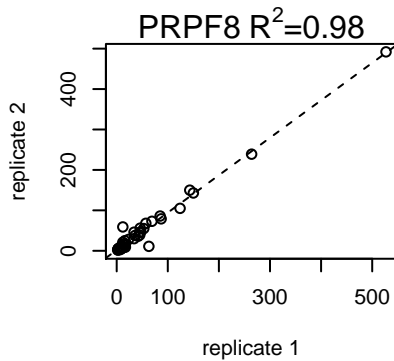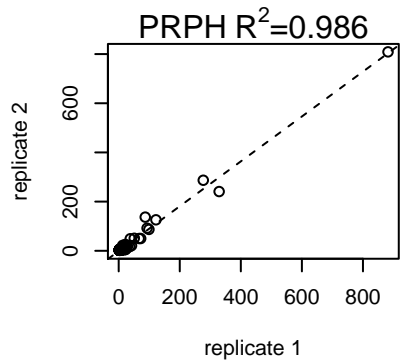

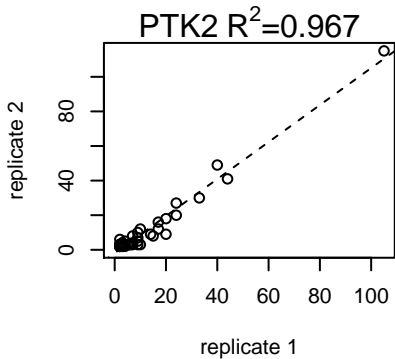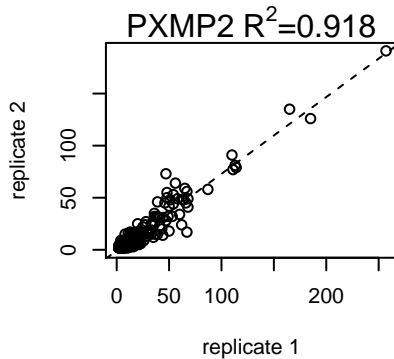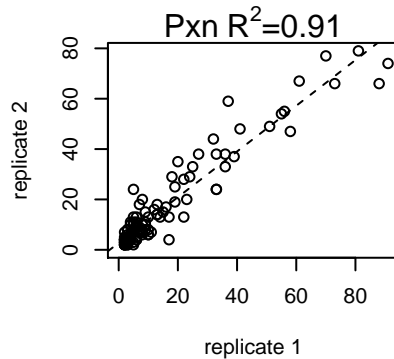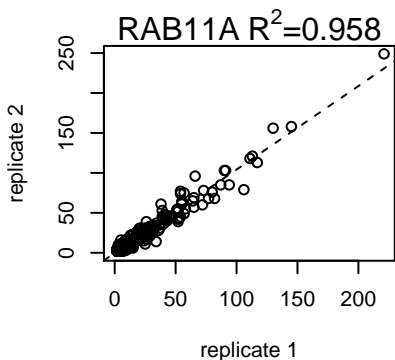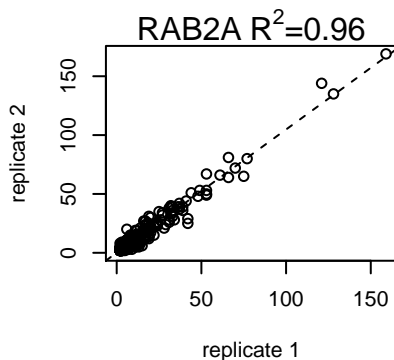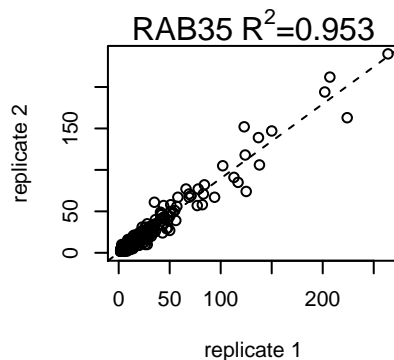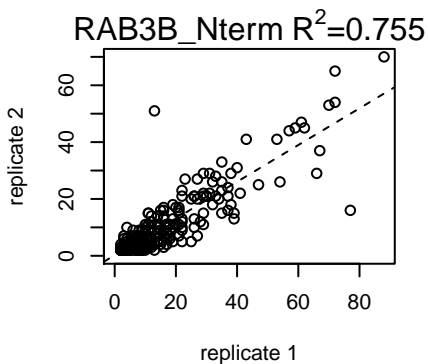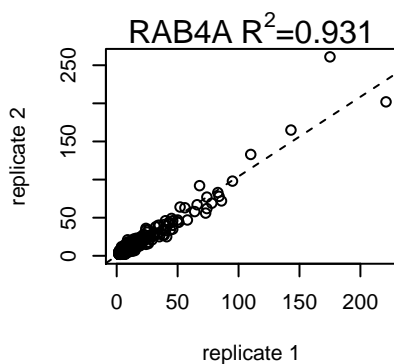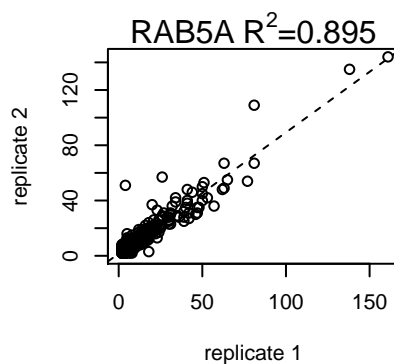

RAB5C  $R^2=0.954$

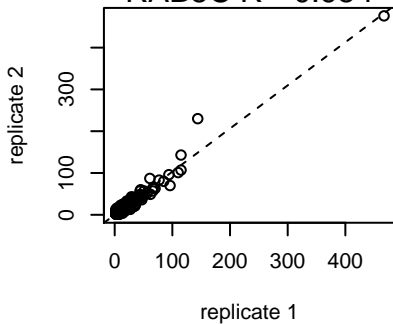

RAB9A  $R^2=0.931$

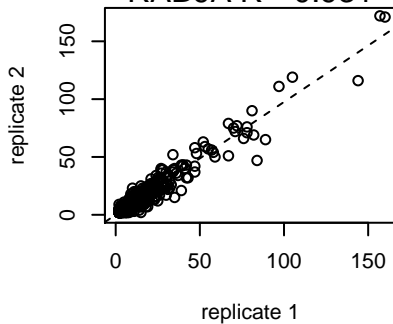

RDX  $R^2=0.966$

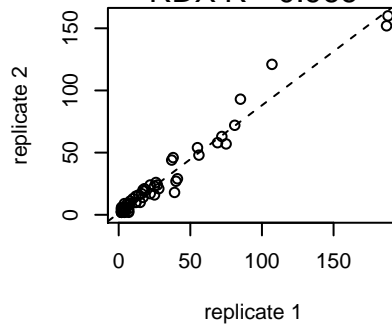

REEP5  $R^2=0.983$

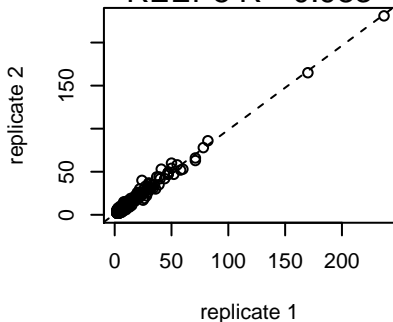

RHOB  $R^2=0.984$

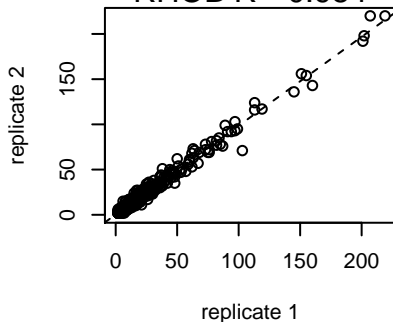

RPL31  $R^2=0.994$

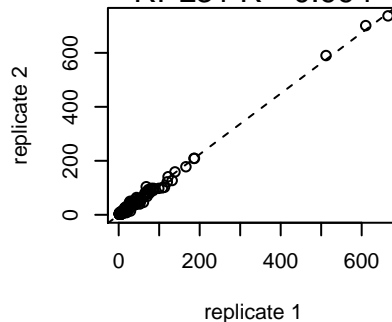

RPN1  $R^2=0.988$

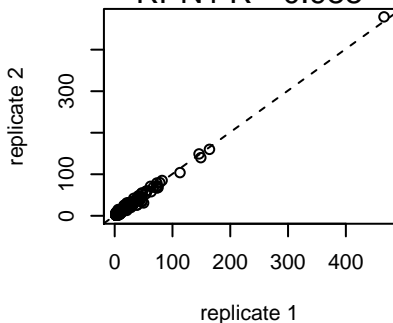

RPN2  $R^2=0.991$

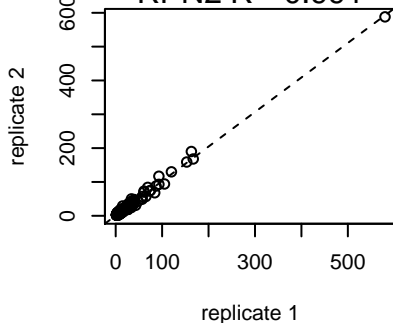

RPS20  $R^2=0.987$

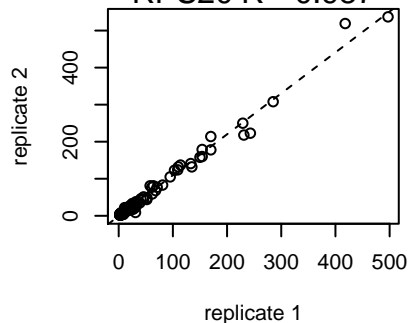

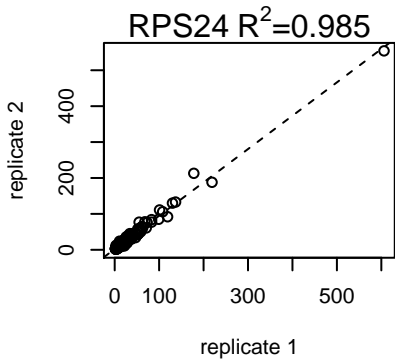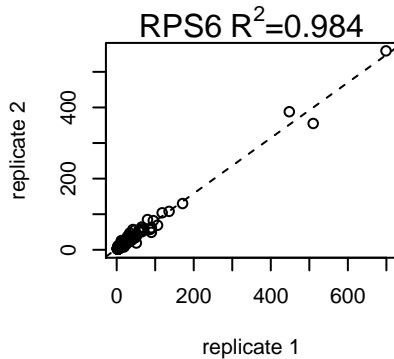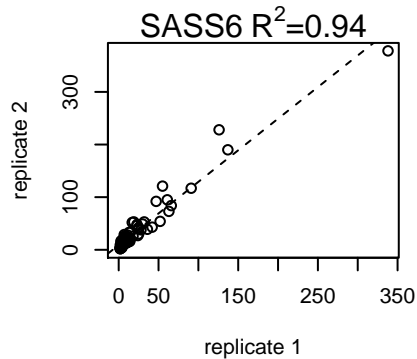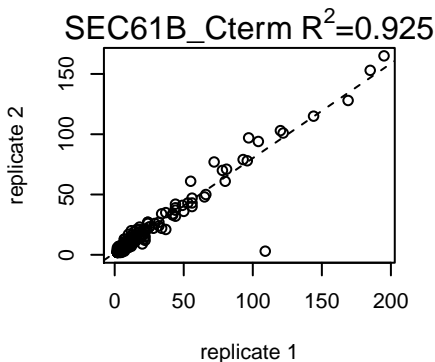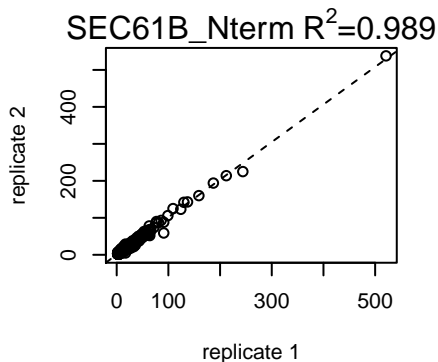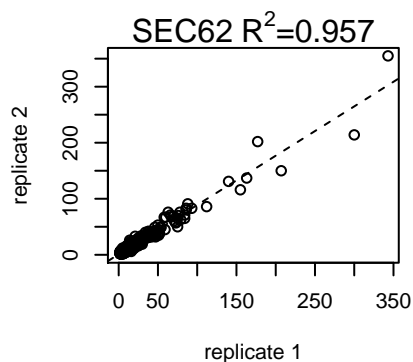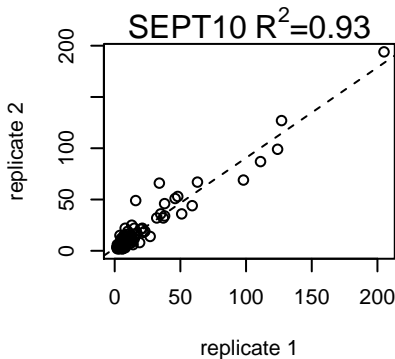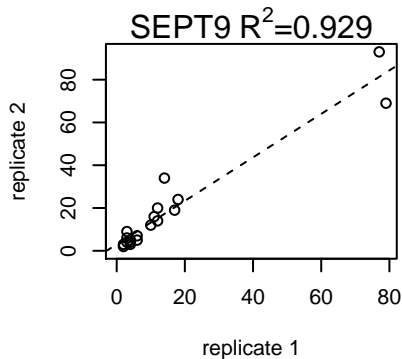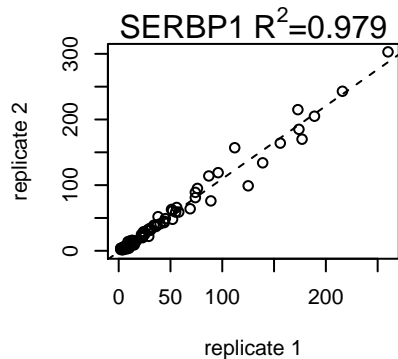

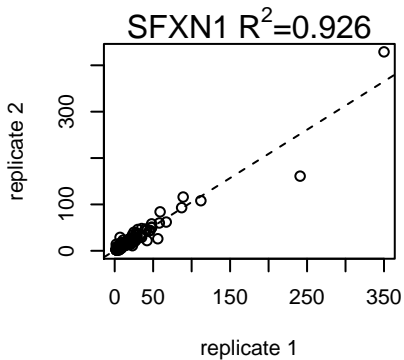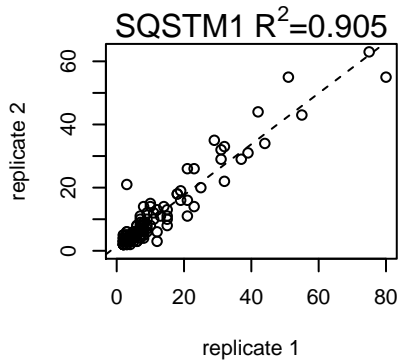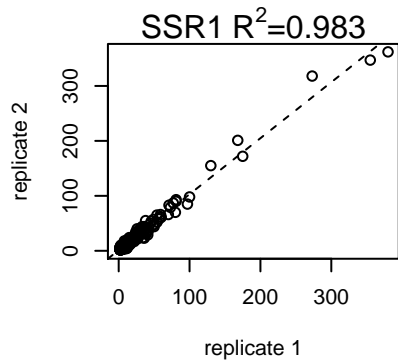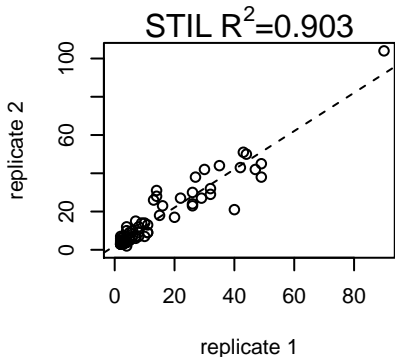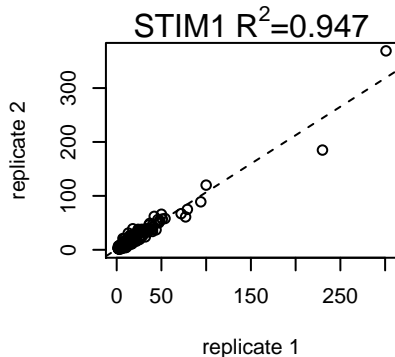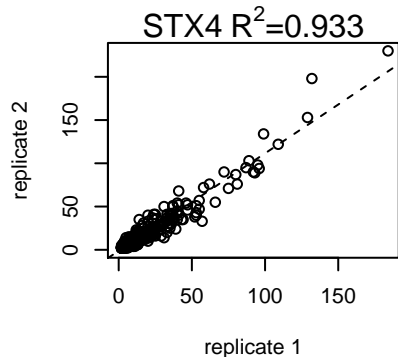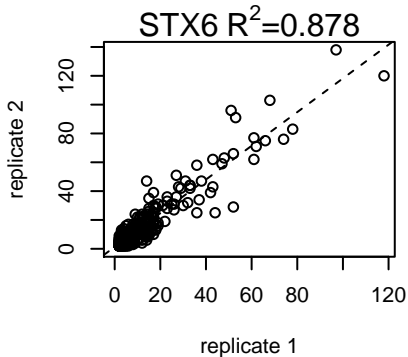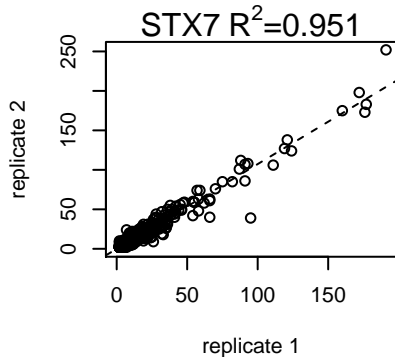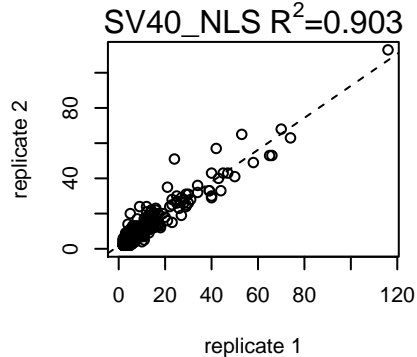

SYNE3\_Cterm  $R^2=0.943$

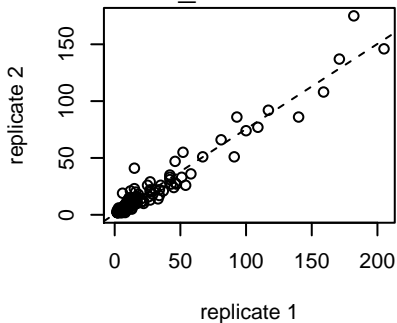

SYNE3\_Nterm  $R^2=0.908$

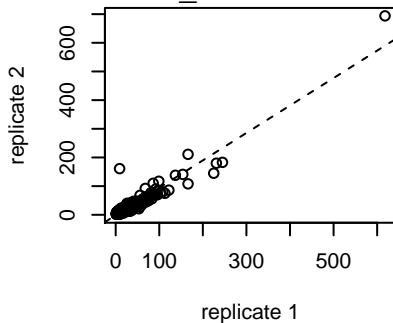

TERF2IP  $R^2=0.905$

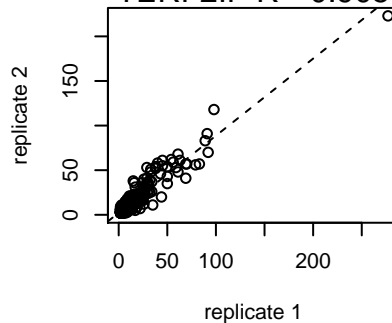

TJP1  $R^2=0.984$

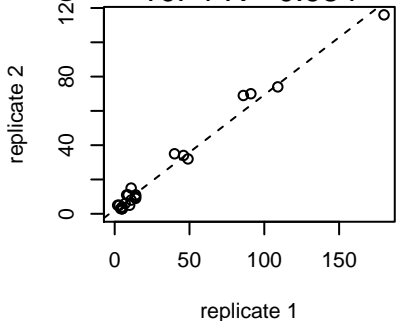

TJP2  $R^2=0.952$

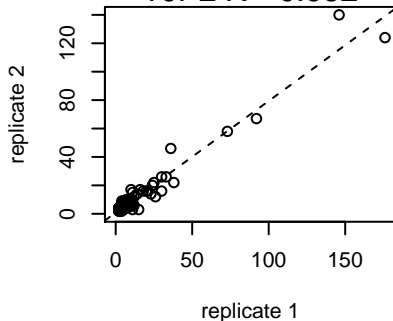

TMOD1  $R^2=0.976$

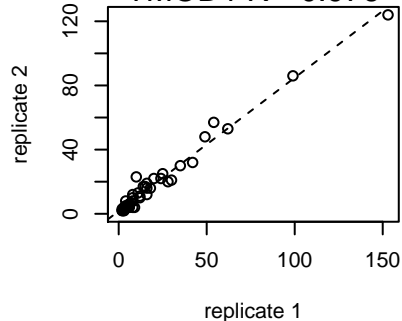

TMPO  $R^2=0.887$

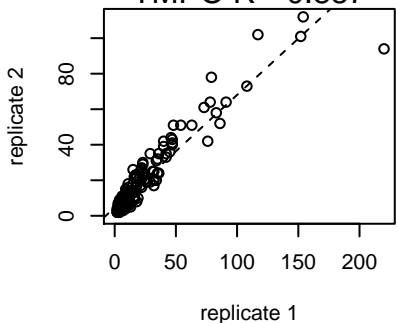

TRAP1  $R^2=0.957$

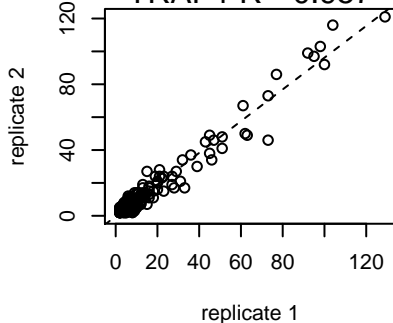

TRIM36\_Cterm  $R^2=0.919$

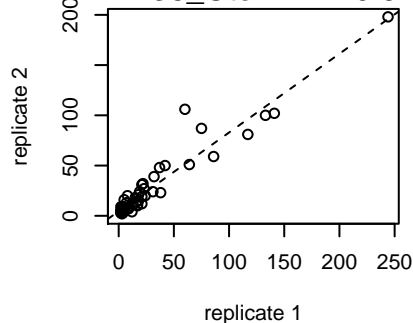



TRIM36\_Nterm  $R^2=0.944$

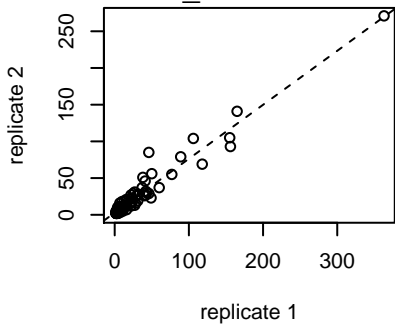

TUBA1A  $R^2=0.999$

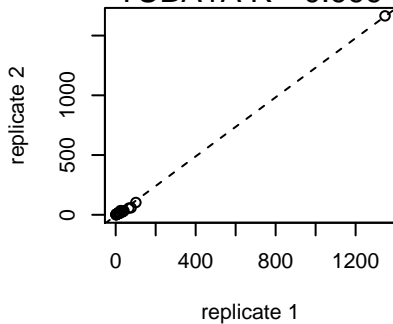

TUBA4A  $R^2=0.998$

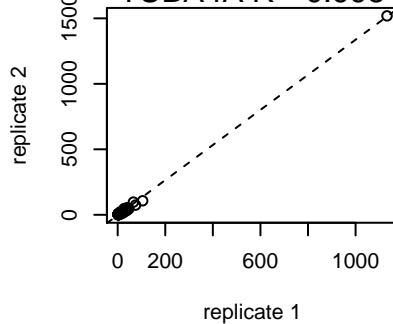

TUBB  $R^2=0.988$

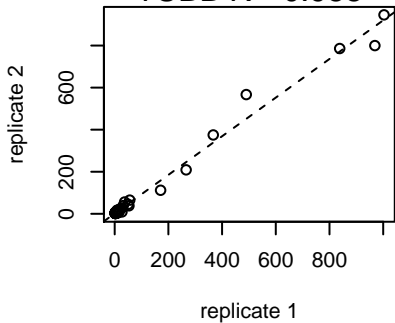

UTP4  $R^2=0.962$

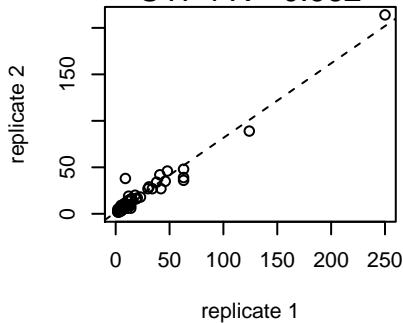

VAPA  $R^2=0.979$

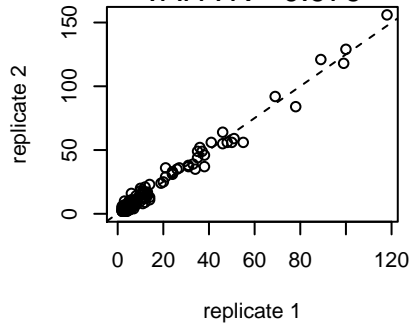

VASP  $R^2=0.971$

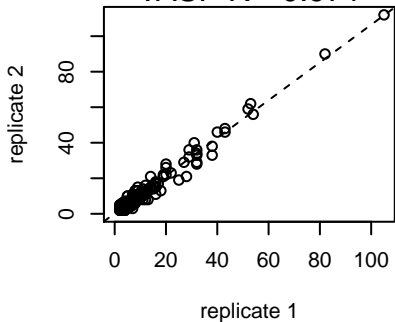

VCL  $R^2=0.799$

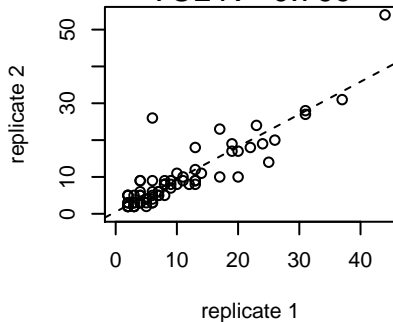

VIM  $R^2=0.965$

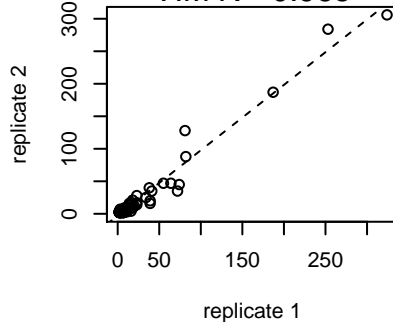

ZFPL1  $R^2=0.979$

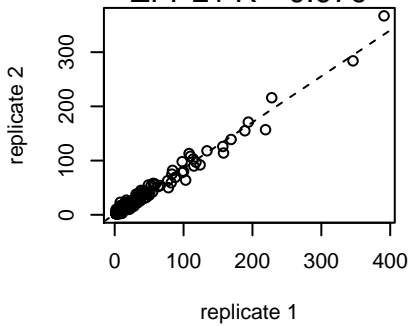

ZNF330\_target  $R^2=0.959$

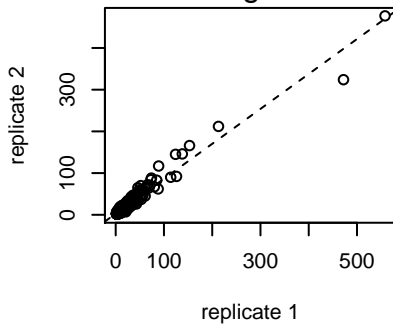

ZYX  $R^2=0.95$

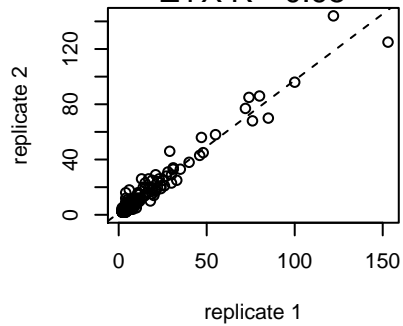

# Supplementary Figure 2

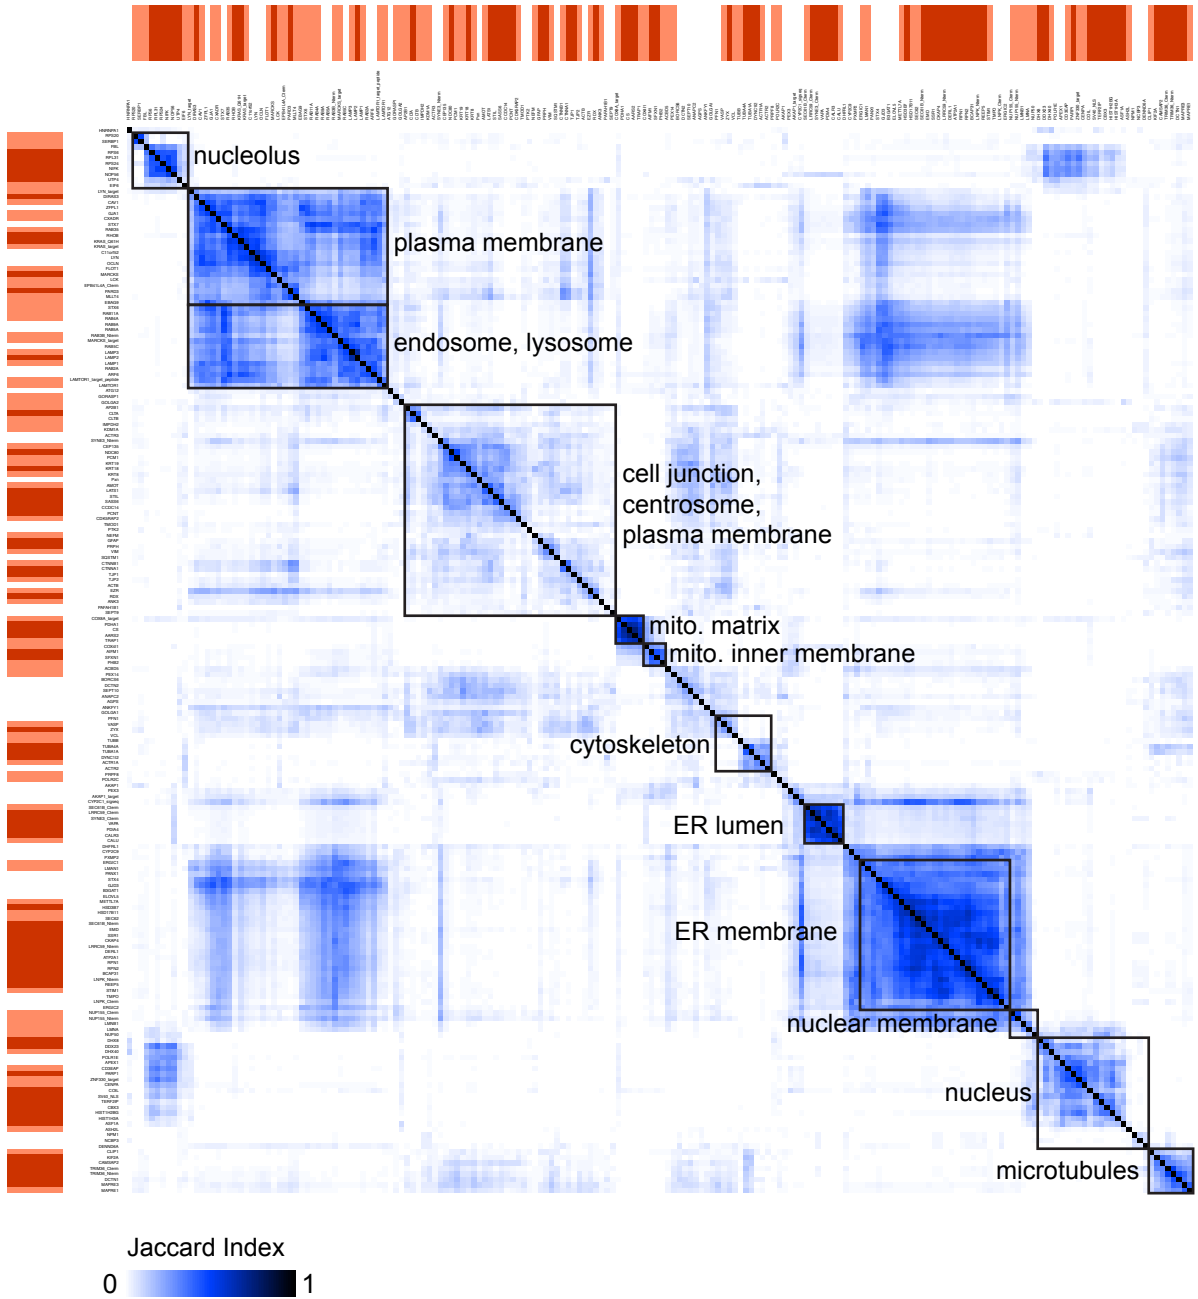

# Supplementary Figure 3

**a**

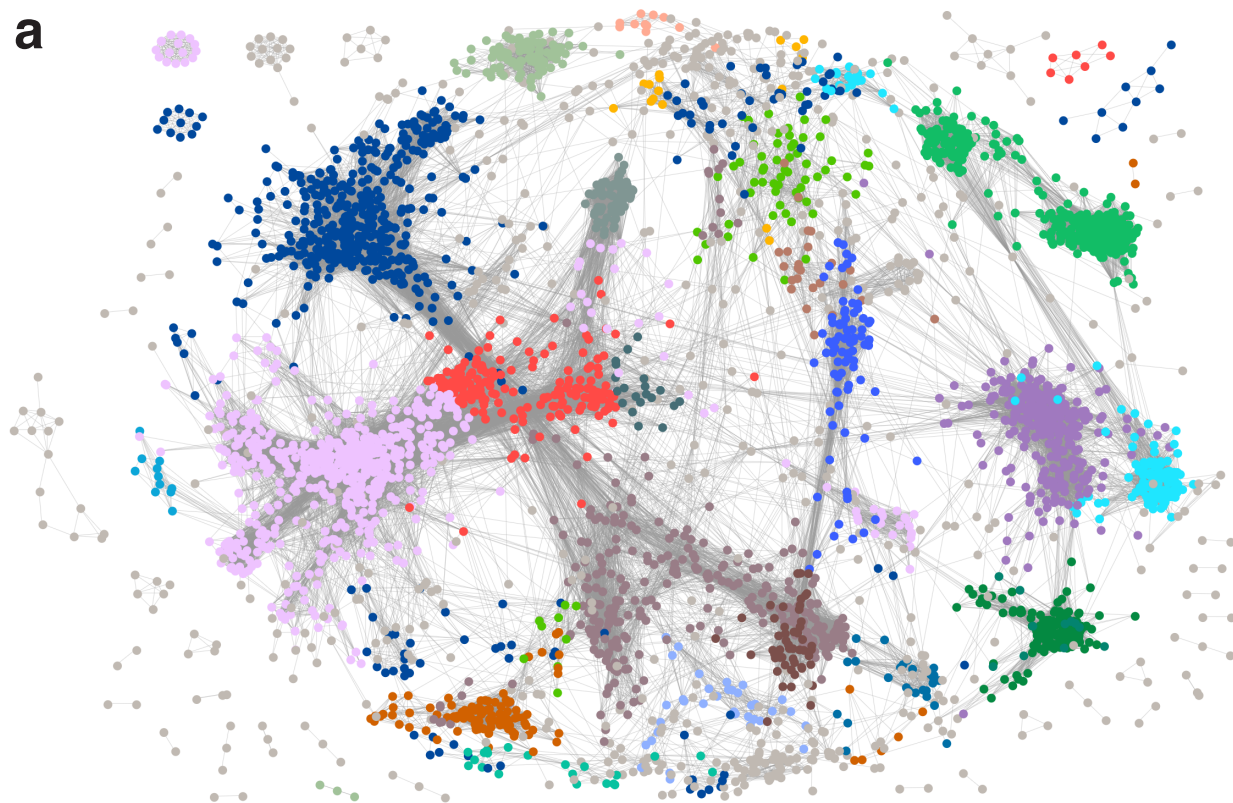

- |                                                          |                                                                                             |
|----------------------------------------------------------|---------------------------------------------------------------------------------------------|
| ■ 1. unknown                                             | ■ 13. cytoplasmic ribonucleoprotein granule                                                 |
| ■ 2. mitochondrial outer membrane, peroxisome            | ■ 14. centrosome enriched, P-body enriched                                                  |
| ■ 3. splicing speckles, nucleolus                        | ■ 15. microtubule cytoskeleton                                                              |
| ■ 4. ER lumen                                            | ■ 16. STRIPAK complex                                                                       |
| ■ 5. spliceosomal complex I                              | ■ 17. Arp2/3 protein complex                                                                |
| ■ 6. clathrin coat                                       | ■ 18. endosome, lysosome                                                                    |
| ■ 7. actin cytoskeleton                                  | ■ 19. nuclear outer membrane-ER membrane network                                            |
| ■ 8. paraspeckles                                        | ■ 20. cell junction, plasma membrane                                                        |
| ■ 9. Golgi apparatus                                     | ■ 21. mitochondrial inner membrane, mitochondrial intermembrane space, mitochondrial matrix |
| ■ 10. centrosome                                         | ■ 22. chromatin, nucleoplasm                                                                |
| ■ 11. chaperonin-containing T-complex, prefoldin complex | ■ 23. spliceosomal complex II                                                               |
| ■ 12. anaphase-promoting complex, kinesin complex        | ■ 24. nuclear pore                                                                          |

**b**

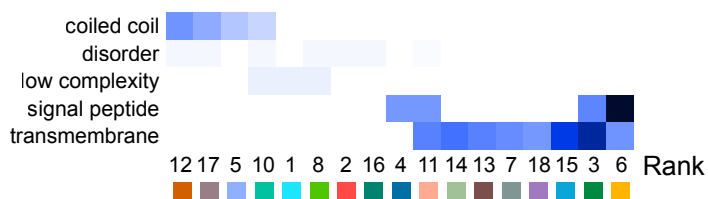

NMF

$\log_2(\text{fold enrichment})$

0

3

**c**

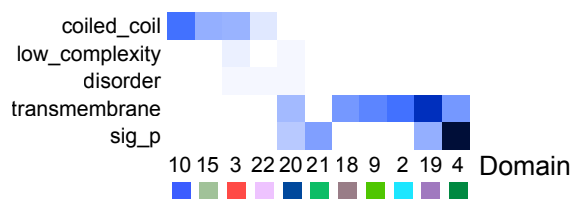

SAFE

# Supplementary Figure 4

**a**

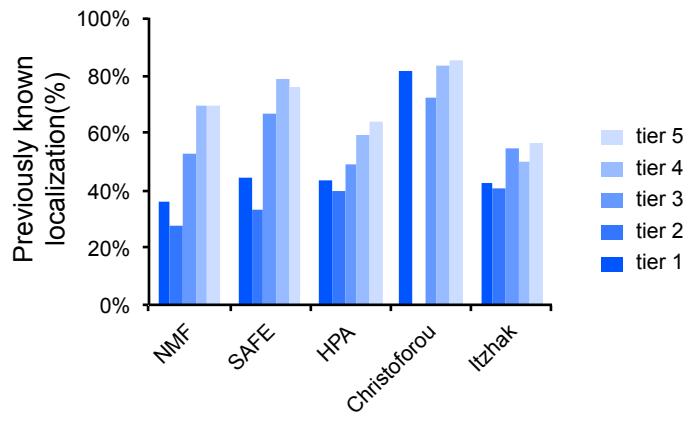

**b**

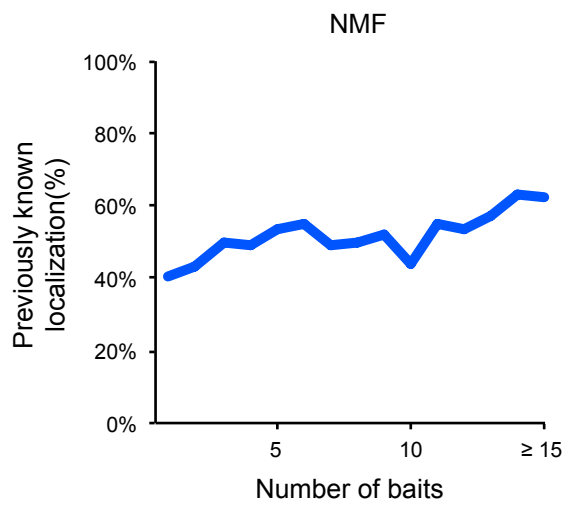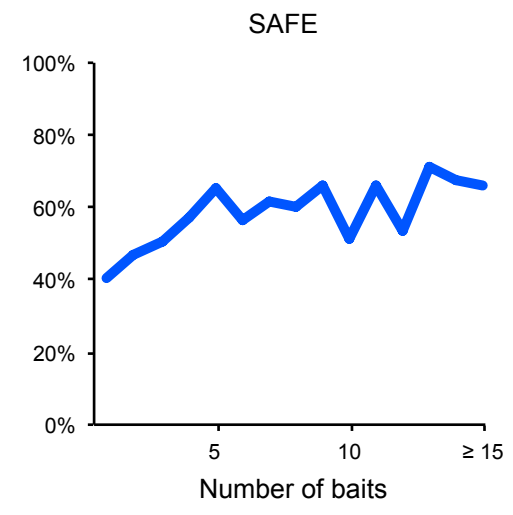

**c**

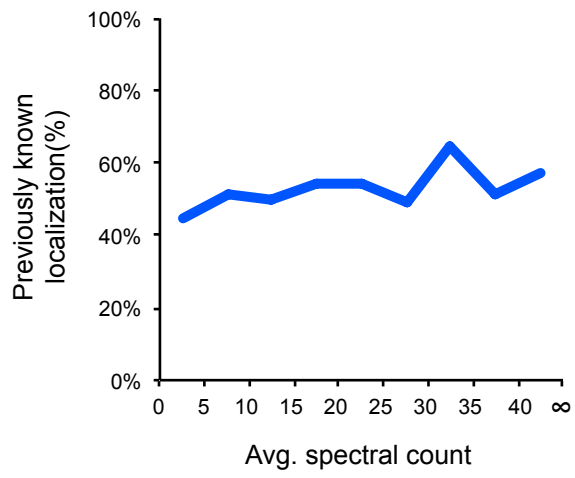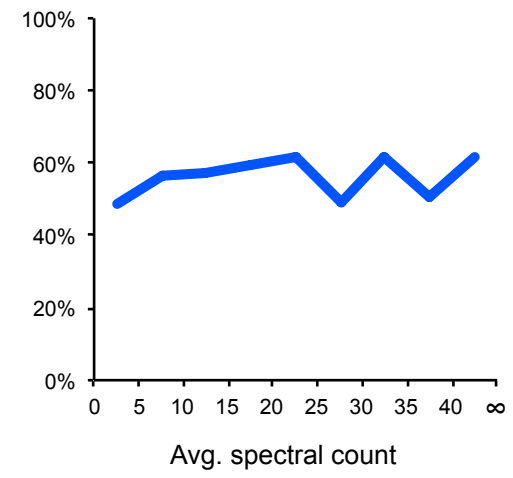

# Supplementary Figure 5

## Supported Primary - IF matches NMF or SAFE prediction

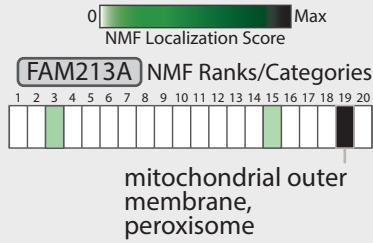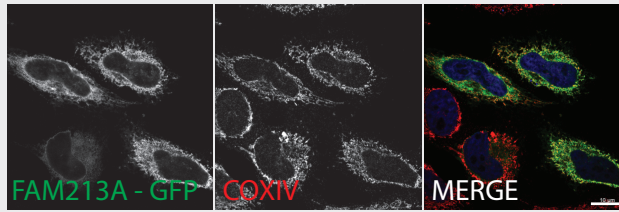

## Supported Consistent - No endogenous compartment marker

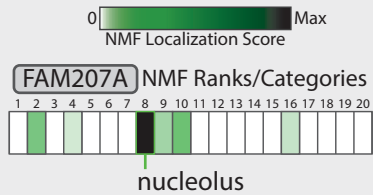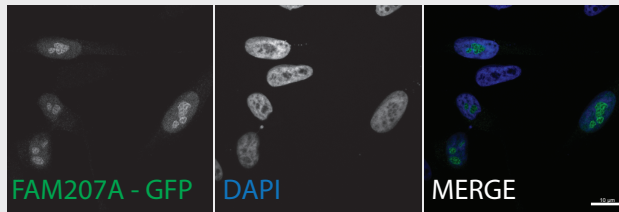

## Contradiction - Does not match prediction

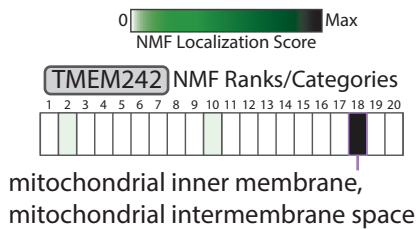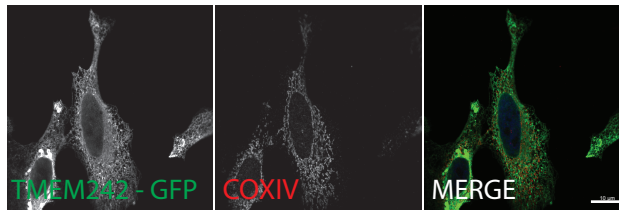

## Inconclusive - No observable compartment staining

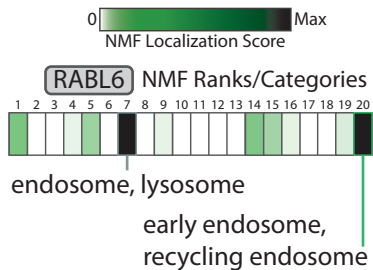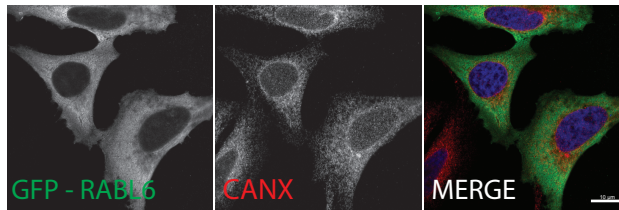

# Supplementary Figure 6

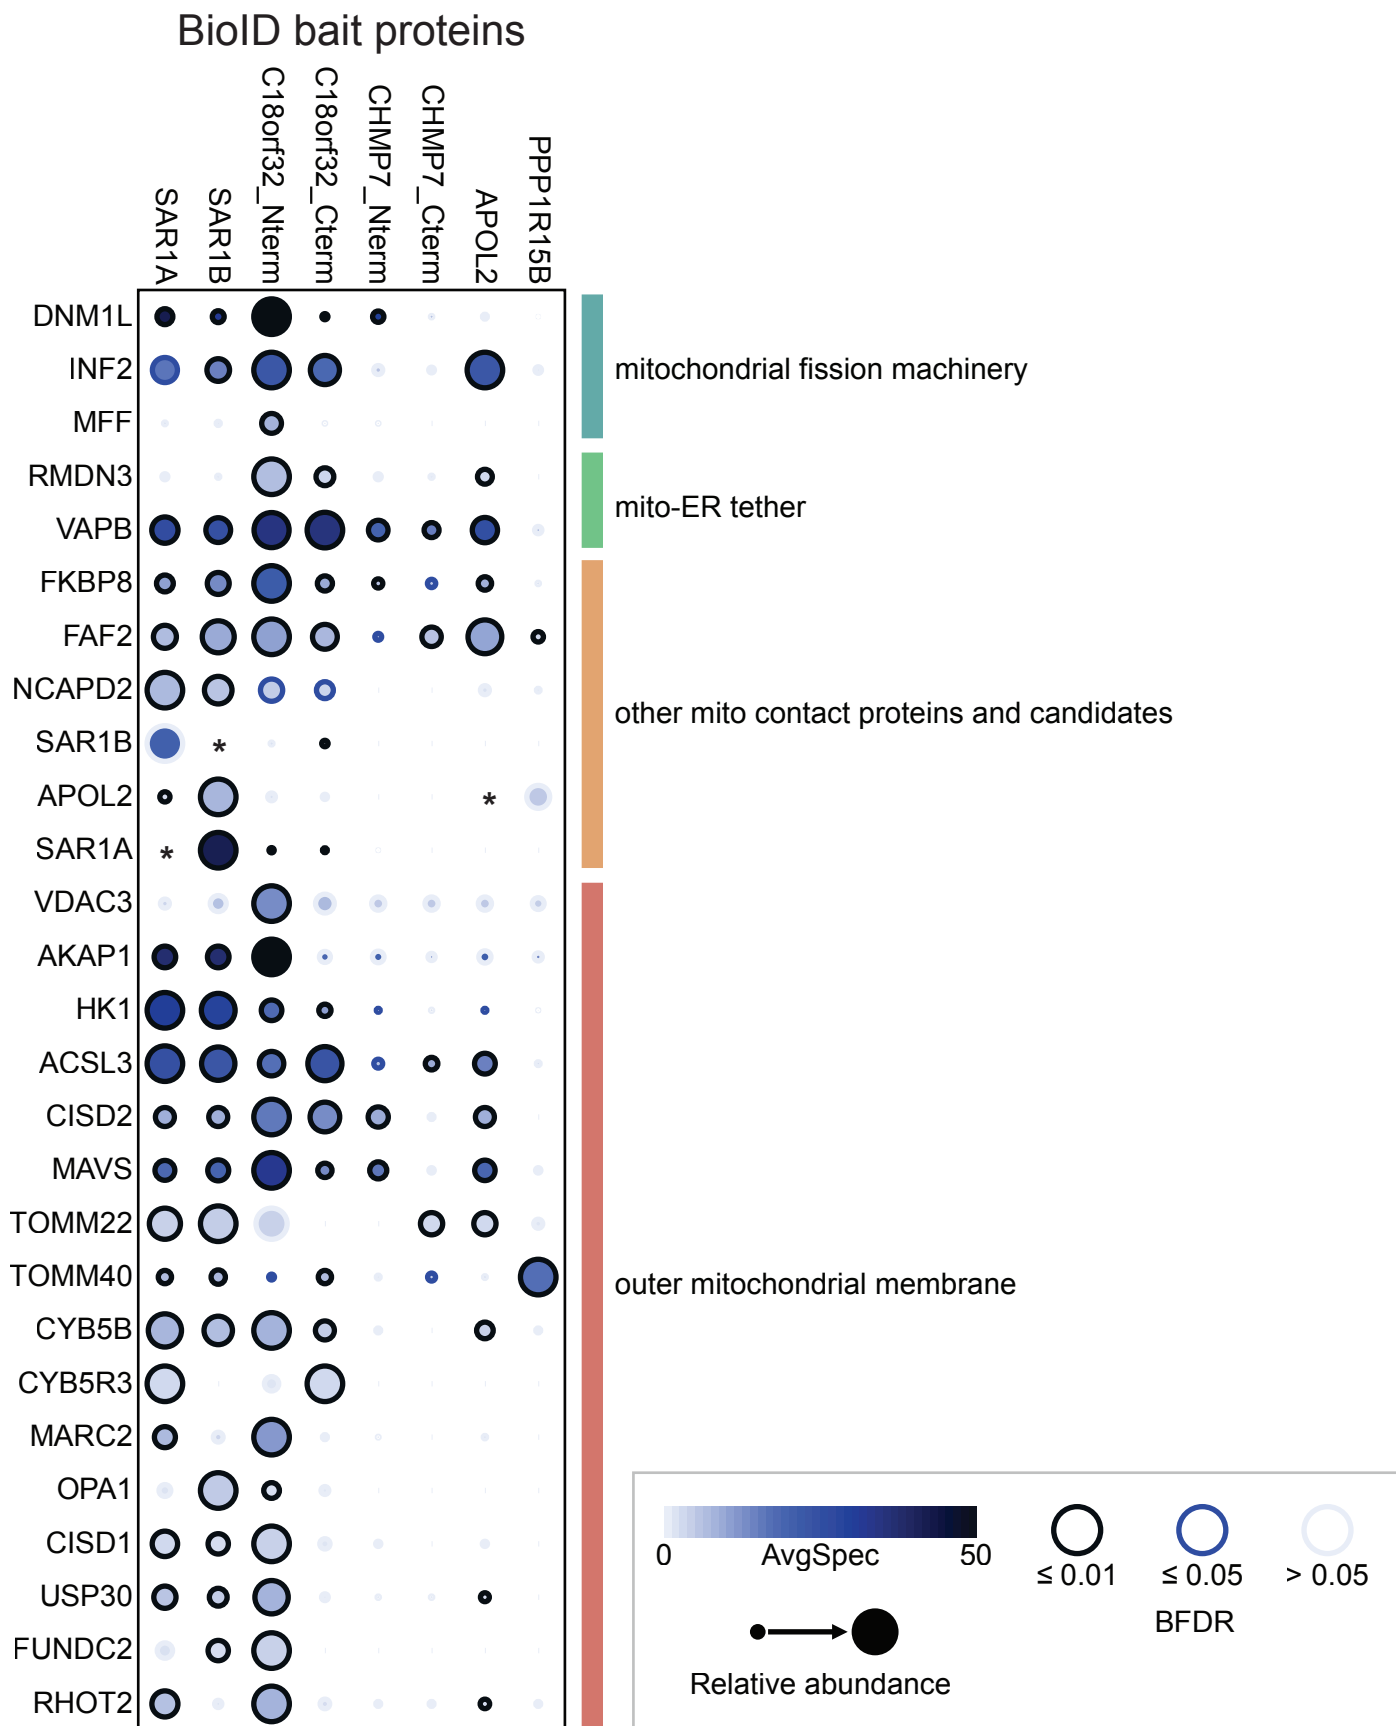

# Supplementary Figure 7

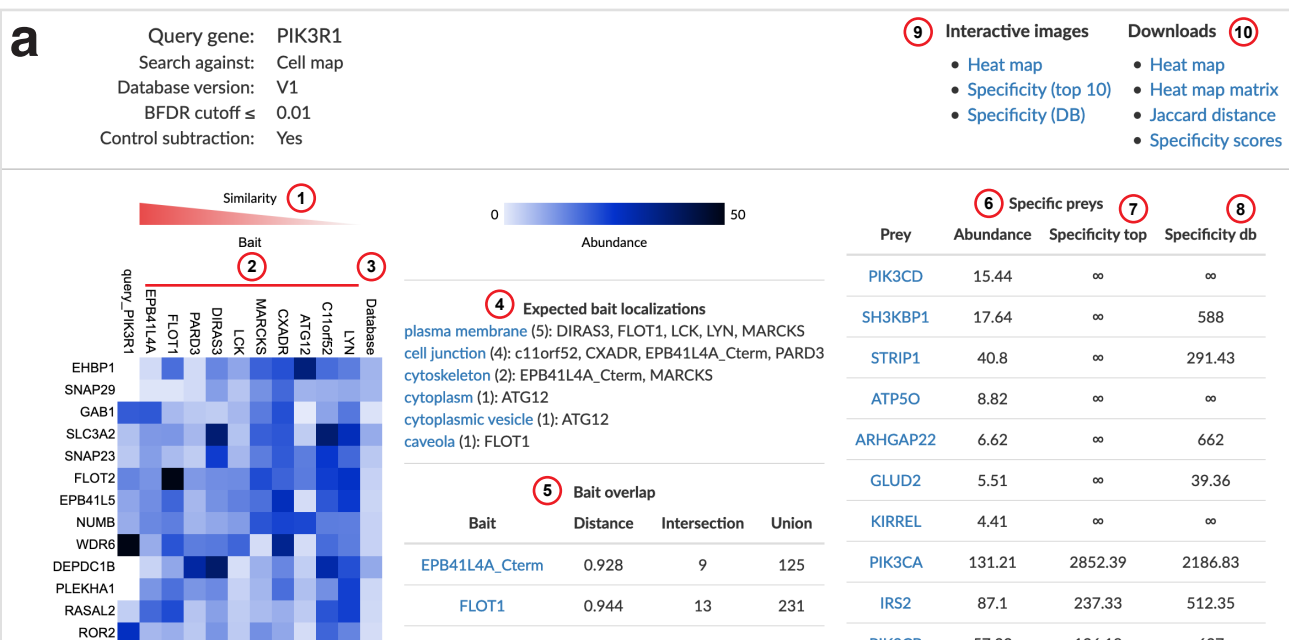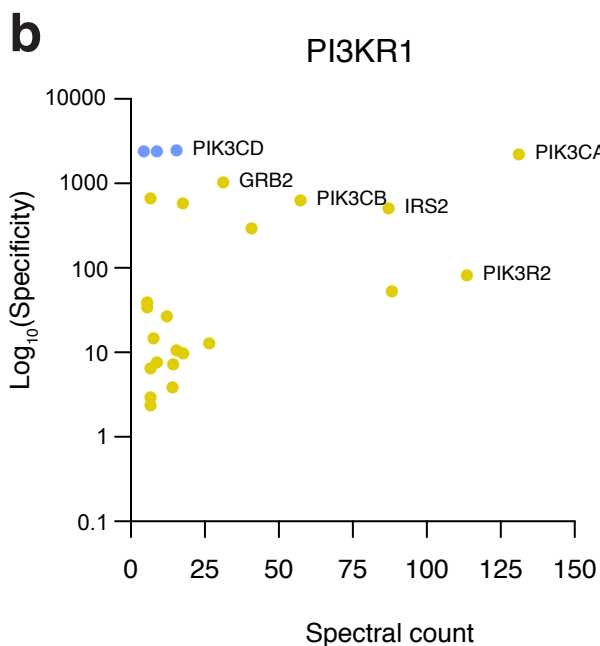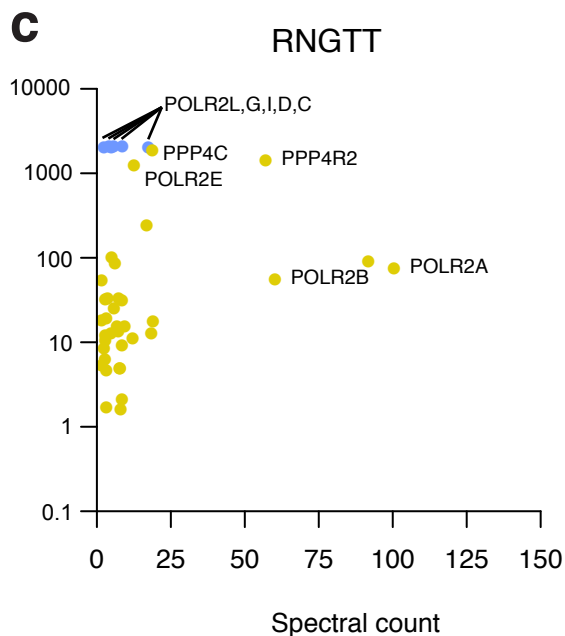



# Supplementary Figure 8

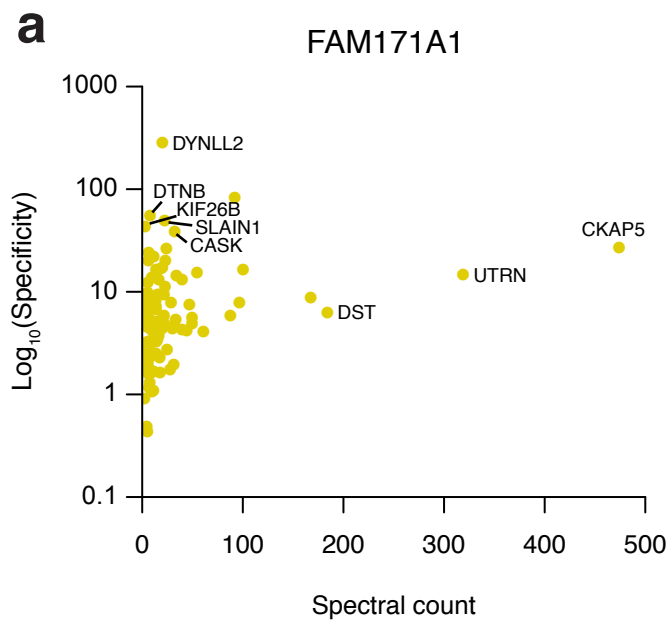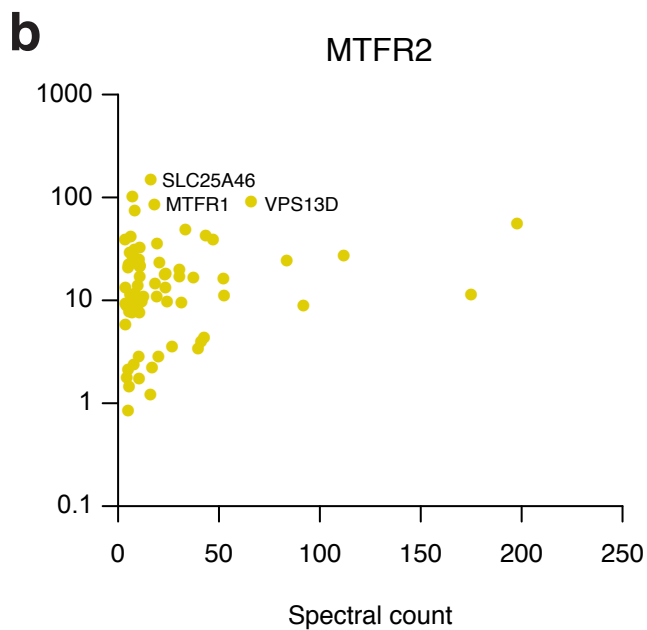

Supplement: Supplementary file [file media-1.pdf]
